# Supplementary material for: Unravelling the structure–luminescence relationship in two dimensional antimony( iii )-doped cadmium( ii ) halide hybrids
Source: Royal Society of Chemistry journal article supplement (doi:10.1039/d4tc03543g), 2024-11-08
Supplement: d4tc03543g1.pdf [file d4tc03543g1.pdf]

## SUPPORTING INFORMATION

### Unravelling Structure - Luminescence Relationship in Two Dimensional Antimony(III) Doped Cadmium (II) Halide Hybrids

*Ashwath Kudlu,<sup>#a</sup> Dhritismita Sarma,<sup>#b</sup> Deep Kumar Das,<sup>a</sup> Alisha Basheer Shamla,<sup>a</sup> Rangarajan Bakthavatsalam,<sup>c</sup>  
Venkatesha R Hathwar<sup>d</sup>, Arup Mahata,<sup>\*b</sup> Janardan Kundu<sup>\*a</sup>*

<sup>a</sup> Indian Institute of Science Education and Research (IISER) Tirupati, Tirupati, Andhra Pradesh-517507, India;

<sup>b</sup> Indian Institute of Technology Hyderabad Sangareddy, Kandi, Telangana-502284 India;

<sup>c</sup> B.M.S College of Engineering, Bull Temple Road, Bengaluru, Karnataka-560019, India.

<sup>d</sup> School of Physical and Applied Sciences, Goa University, Panaji, Goa 403206, India.

# Equal contribution

\*Email: [arup@chy.iith.ac.in](mailto:arup@chy.iith.ac.in) (Arup Mahata)

\*Email: [janardan@iisertirupati.ac.in](mailto:janardan@iisertirupati.ac.in); ORCID:0000-0003-4879-0235; (Janardan Kundu)

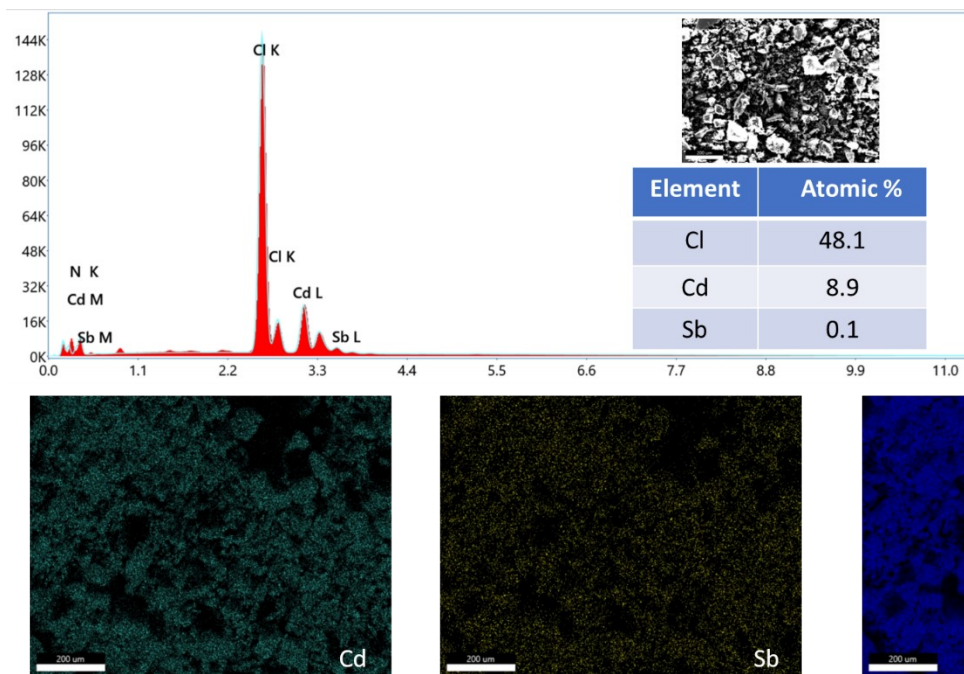

Figure S1. SEM EDS analysis of Sb:DETACdCl hybrid.

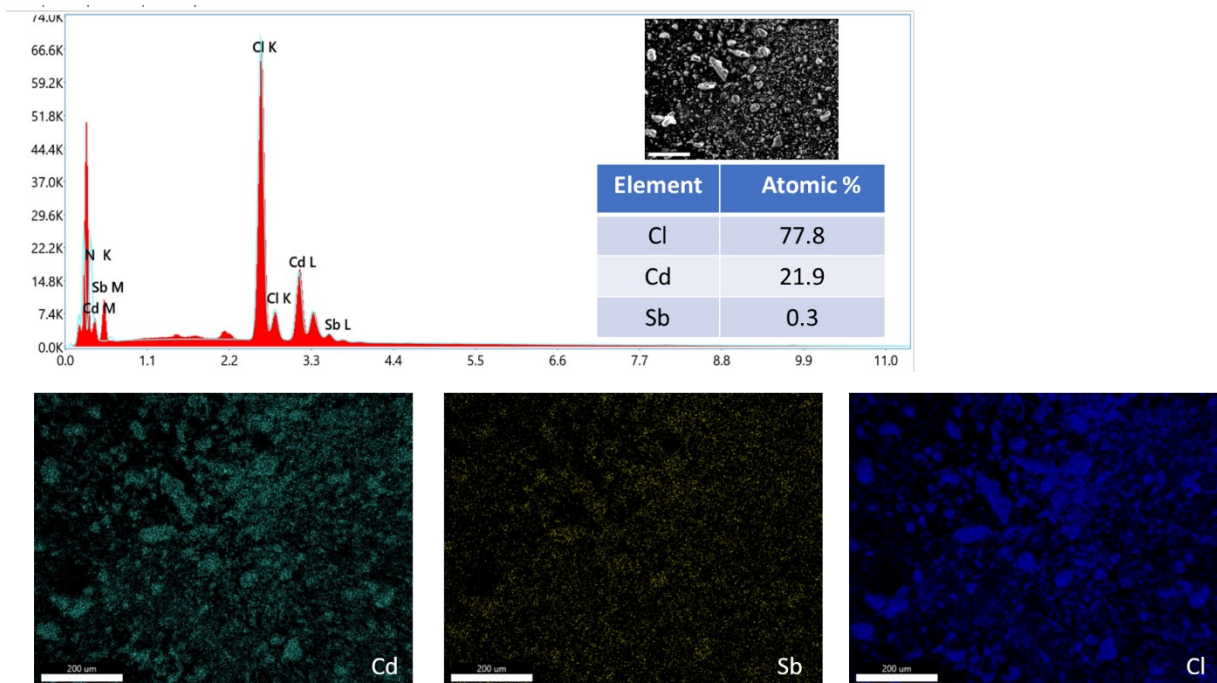

Figure S2. SEM EDS analysis of Sb:PDACdCl hybrid.

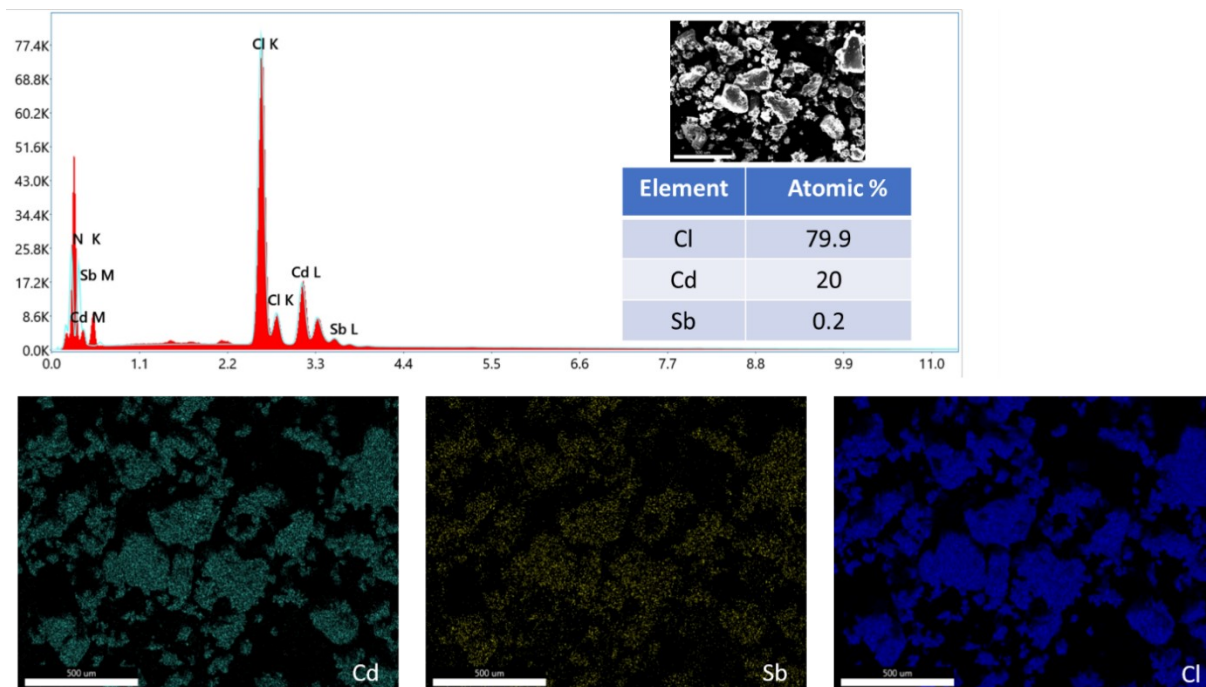

Figure S3. SEM EDS analysis of Sb:DABCdCl hybrid.

Table S1. ICP Analysis of doped hybrids (Sb:DETACdCl, Sb:PDACdCl, Sb:DABCdCl)

| Compound     | Sb feed percentage | Sb percentage from ICP |
|--------------|--------------------|------------------------|
| Sb: PDACdCl  | 10%                | 0.0008                 |
|              | 30%                | 0.0062                 |
|              | 50%                | 0.0110                 |
| Sb: DETACdCl | 10%                | 0.0028                 |
|              | 30%                | 0.0033                 |
|              | 50%                | 0.0365                 |
| Sb: DABCdCl  | 10%                | 0.0027                 |
|              | 30%                | 0.0167                 |
|              | 50%                | 0.0063                 |

Table S2: Comparison of structural and optical properties of host hybrids.

| Compound                                                                                          | Space group                           | Octahedral distortion (d) | Bond angle variance (deg <sup>2</sup> ) | M-Cl-M (deg) | $\Phi_{\text{tilt}}$ (deg) | PL Max (nm) | PLE Peak positions (nm) | PLQY(%) |
|---------------------------------------------------------------------------------------------------|---------------------------------------|---------------------------|-----------------------------------------|--------------|----------------------------|-------------|-------------------------|---------|
| DETACdCl<br>C <sub>4</sub> H <sub>16</sub> N <sub>3</sub> Cd Cl <sub>5</sub>                      | Orthorhombic<br><i>Pnma</i>           | $8.51 \times 10^{-5}$     | 2.1785                                  | 153.48       | 11.25                      | 490         | 274, 330, 380           | 3.5     |
| PDACdCl<br>C <sub>5</sub> H <sub>16</sub> N <sub>2</sub> Cd Cl <sub>4</sub>                       | Orthorhombic<br><i>Imma</i>           | $9.22 \times 10^{-4}$     | 1.4491                                  | 168.40       | 12.49                      | 480         | 398                     | 0.5     |
| DABCdCl<br>2(C <sub>4</sub> H <sub>14</sub> N <sub>2</sub> )<br>Cd <sub>2</sub> Cl <sub>3</sub> O | Monoclinic<br><i>P2<sub>1</sub>/c</i> | $1.4 \times 10^{-3}$      | 0.6413                                  | 165.64       | 13.03                      | 465         | 280, 330, 375           | 3.6     |

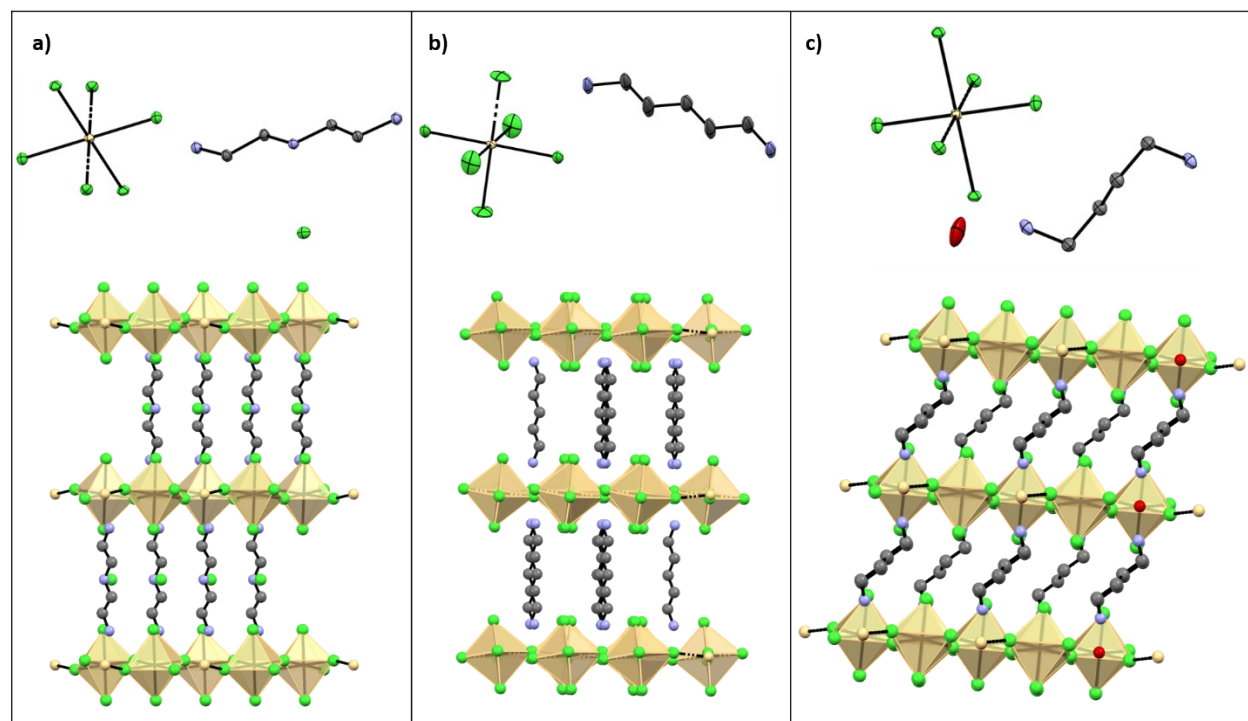

Figure S4: Asymmetric unit and packing diagram of host hybrids- a) DETACdCl, b) PDACdCl, c) DABCdCl.

Table S3: SCXRD parameters of doped hybrids

| Identification code                               | Sb:DETACdCl                                                        | Sb:PDACdCl                                                         | Sb:DABCdCl                                                                            |
|---------------------------------------------------|--------------------------------------------------------------------|--------------------------------------------------------------------|---------------------------------------------------------------------------------------|
| <b>Empirical formula</b>                          | C <sub>4</sub> H <sub>16</sub> CdCl <sub>5</sub> N <sub>3</sub> Sb | C <sub>5</sub> H <sub>16</sub> CdCl <sub>4</sub> N <sub>2</sub> Sb | C <sub>8</sub> H <sub>28</sub> Cd <sub>2</sub> Cl <sub>8</sub> N <sub>4</sub> O<br>Sb |
| <b>Formula weight</b>                             | 395.85                                                             | 358.40                                                             | 704.74                                                                                |
| <b>Temperature/K</b>                              | 150.00                                                             | 150.00                                                             | 150.00                                                                                |
| <b>Crystal system</b>                             | orthorhombic                                                       | orthorhombic                                                       | monoclinic                                                                            |
| <b>Space group</b>                                | Pnma                                                               | Imma                                                               | P2 <sub>1</sub> /c                                                                    |
| <b>a/Å</b>                                        | 7.1960(4)                                                          | 7.2902(3)                                                          | 9.4098(4)                                                                             |
| <b>b/Å</b>                                        | 24.6826(14)                                                        | 24.0668(12)                                                        | 7.5645(3)                                                                             |
| <b>c/Å</b>                                        | 7.2487(4)                                                          | 7.4496(4)                                                          | 7.6395(4)                                                                             |
| <b>α/°</b>                                        | 90                                                                 | 90                                                                 | 90                                                                                    |
| <b>β/°</b>                                        | 90                                                                 | 90                                                                 | 102.01                                                                                |
| <b>γ/°</b>                                        | 90                                                                 | 90                                                                 | 90                                                                                    |
| <b>Volume/Å<sup>3</sup></b>                       | 1287.49(12)                                                        | 1307.05(11)                                                        | 531.89(4)                                                                             |
| <b>Z</b>                                          | 4                                                                  | 4                                                                  | 1                                                                                     |
| <b>ρ<sub>calc</sub>/cm<sup>3</sup></b>            | 2.042                                                              | 1.821                                                              | 2.200                                                                                 |
| <b>μ/mm<sup>-1</sup></b>                          | 2.698                                                              | 2.448                                                              | 3.009                                                                                 |
| <b>F(000)</b>                                     | 776.0                                                              | 704.0                                                              | 344.0                                                                                 |
| <b>Crystal size/mm<sup>3</sup></b>                | 0.22 × 0.21 × 0.2                                                  | 0.21 × 0.2 × 0.19                                                  | 0.21 × 0.2 × 0.2                                                                      |
| <b>Radiation</b>                                  | MoKα (λ = 0.71073)                                                 | MoKα (λ = 0.71073)                                                 | MoKα (λ = 0.71073)                                                                    |
| <b>2θ range for data collection/°</b>             | 5.858 to 52.764                                                    | 5.724 to 52.736                                                    | 6.972 to 52.716                                                                       |
| <b>Index ranges</b>                               | -8 ≤ h ≤ 9, -30 ≤ k ≤ 30, -9 ≤ l ≤ 9                               | -9 ≤ h ≤ 9, -30 ≤ k ≤ 30, -9 ≤ l ≤ 9                               | -11 ≤ h ≤ 11, -9 ≤ k ≤ 9, -9 ≤ l ≤ 9                                                  |
| <b>Reflections collected</b>                      | 27418                                                              | 15463                                                              | 5946                                                                                  |
| <b>Independent reflections</b>                    | 1343 [R <sub>int</sub> = 0.0289, R <sub>sigma</sub> = 0.0122]      | 742 [R <sub>int</sub> = 0.0506, R <sub>sigma</sub> = 0.0203]       | 1092 [R <sub>int</sub> = 0.0366, R <sub>sigma</sub> = 0.0282]                         |
| <b>Data/restraints/parameters</b>                 | 1343/0/65                                                          | 742/0/43                                                           | 1092/3/70                                                                             |
| <b>Goodness-of-fit on F<sup>2</sup></b>           | 1.107                                                              | 1.093                                                              | 1.163                                                                                 |
| <b>Final R indexes [I ≥ 2σ (I)]</b>               | R <sub>1</sub> = 0.0132, wR <sub>2</sub> = 0.0379                  | R <sub>1</sub> = 0.0318, wR <sub>2</sub> = 0.0939                  | R <sub>1</sub> = 0.0251, wR <sub>2</sub> = 0.0651                                     |
| <b>Final R indexes [all data]</b>                 | R <sub>1</sub> = 0.0138, wR <sub>2</sub> = 0.0383                  | R <sub>1</sub> = 0.0323, wR <sub>2</sub> = 0.0946                  | R <sub>1</sub> = 0.0260, wR <sub>2</sub> = 0.0655                                     |
| <b>Largest diff. peak/hole / e Å<sup>-3</sup></b> | 0.37/-0.33                                                         | 1.65/-0.90                                                         | 0.57/-0.95                                                                            |

Table S4: SCXRD parameters of host hybrids

| Identification code                               | DETACdCl                                                        | PDACdCl                                                         | DABCdCl                                                                         |
|---------------------------------------------------|-----------------------------------------------------------------|-----------------------------------------------------------------|---------------------------------------------------------------------------------|
| <b>Empirical formula</b>                          | C <sub>4</sub> H <sub>16</sub> CdCl <sub>5</sub> N <sub>3</sub> | C <sub>5</sub> H <sub>16</sub> CdCl <sub>4</sub> N <sub>2</sub> | C <sub>8</sub> H <sub>28</sub> Cd <sub>2</sub> Cl <sub>8</sub> N <sub>4</sub> O |
| <b>Formula weight</b>                             | 395.85                                                          | 358.40                                                          | 704.781                                                                         |
| <b>Temperature/K</b>                              | 150.00                                                          | 150.00                                                          | 150.00                                                                          |
| <b>Crystal system</b>                             | orthorhombic                                                    | orthorhombic                                                    | monoclinic                                                                      |
| <b>Space group</b>                                | Pnma                                                            | Imma                                                            | P2 <sub>1</sub> /c                                                              |
| <b>a/Å</b>                                        | 7.1977(3)                                                       | 7.2884(4)                                                       | 9.4203(6)                                                                       |
| <b>b/Å</b>                                        | 24.7093(9)                                                      | 24.0679(13)                                                     | 7.5615(4)                                                                       |
| <b>c/Å</b>                                        | 7.2486(3)                                                       | 7.4490(4)                                                       | 7.6317(5)                                                                       |
| <b>α/°</b>                                        | 90                                                              | 90                                                              | 90                                                                              |
| <b>β/°</b>                                        | 90                                                              | 90                                                              | 101.956(2)                                                                      |
| <b>γ/°</b>                                        | 90                                                              | 90                                                              | 90                                                                              |
| <b>Volume/Å<sup>3</sup></b>                       | 1289.16(9)                                                      | 1306.68(12)                                                     | 531.83(6)                                                                       |
| <b>Z</b>                                          | 4                                                               | 4                                                               | 1                                                                               |
| <b>ρ<sub>calc</sub>/g/cm<sup>3</sup></b>          | 2.040                                                           | 1.822                                                           | 2.201                                                                           |
| <b>μ/mm<sup>-1</sup></b>                          | 2.695                                                           | 2.449                                                           | 3.010                                                                           |
| <b>F(000)</b>                                     | 776.0                                                           | 704.0                                                           | 343.7                                                                           |
| <b>Crystal size/mm<sup>3</sup></b>                | 0.22 × 0.21 × 0.21                                              | 0.16 × 0.15 × 0.15                                              | 0.16 × 0.15 × 0.15                                                              |
| <b>Radiation</b>                                  | MoKα (λ = 0.71073)                                              | MoKα (λ = 0.71073)                                              | Mo Kα (λ = 0.71073)                                                             |
| <b>2θ range for data collection/°</b>             | 5.858 to 52.768                                                 | 5.724 to 52.792                                                 | 4.42 to 52.74                                                                   |
| <b>Index ranges</b>                               | -9 ≤ h ≤ 8, -30 ≤ k ≤ 30, -9 ≤ l ≤ 8                            | -9 ≤ h ≤ 9, -30 ≤ k ≤ 30, ≤ l ≤ 9                               | -9 ≤ h ≤ 11, -9 ≤ k ≤ 9, -9 ≤ l ≤ 9                                             |
| <b>Reflections collected</b>                      | 15415                                                           | 17999                                                           | 8524                                                                            |
| <b>Independent reflections</b>                    | 1338 [R <sub>int</sub> = 0.0313, R <sub>sigma</sub> = 0.0141]   | 737 [R <sub>int</sub> = 0.0262, R <sub>sigma</sub> = 0.0110]    | 1082 [R <sub>int</sub> = 0.0429, R <sub>sigma</sub> = 0.0266]                   |
| <b>Data/restraints/parameters</b>                 | 1338/0/65                                                       | 737/1/48                                                        | 1082/3/70                                                                       |
| <b>Goodness-of-fit on F<sup>2</sup></b>           | 1.137                                                           | 1.145                                                           | 1.007                                                                           |
| <b>Final R indexes [I &gt; 2σ(I)]</b>             | R <sub>1</sub> = 0.0140, wR <sub>2</sub> = 0.0366               | R <sub>1</sub> = 0.0205, wR <sub>2</sub> = 0.0646               | R <sub>1</sub> = 0.0290, wR <sub>2</sub> = 0.0880                               |
| <b>Final R indexes [all data]</b>                 | R <sub>1</sub> = 0.0144, wR <sub>2</sub> = 0.0369               | R <sub>1</sub> = 0.0208, wR <sub>2</sub> = 0.0650               | R <sub>1</sub> = 0.0293, wR <sub>2</sub> = 0.0882                               |
| <b>Largest diff. peak/hole / e Å<sup>-3</sup></b> | 0.37/-0.43                                                      | 0.67/-0.66                                                      | 0.69/-1.10                                                                      |



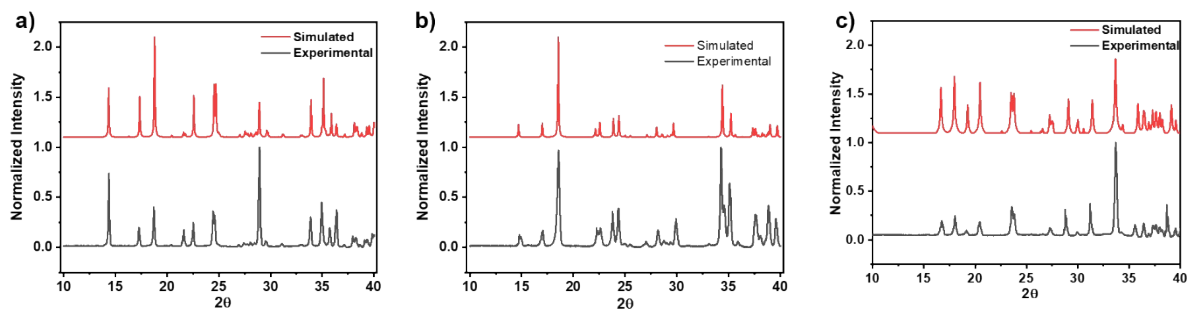

Figure S5: Simulated Vs. experimental PXRD patterns of doped hybrids- a) Sb:DETACdCl, b) Sb:PDACdCl, c) Sb:DABCdCl.

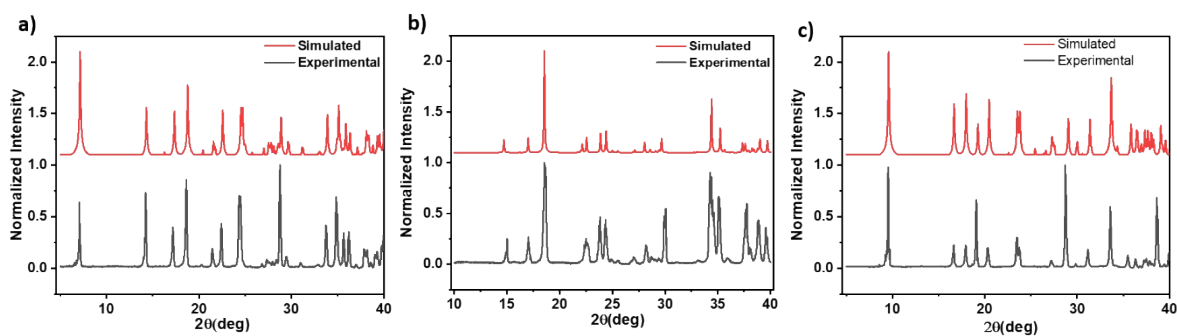

Figure S6: Simulated Vs. experimental PXRD patterns of host hybrids- a) DETACdCl, b) PDACdCl, c) DABCdCl.

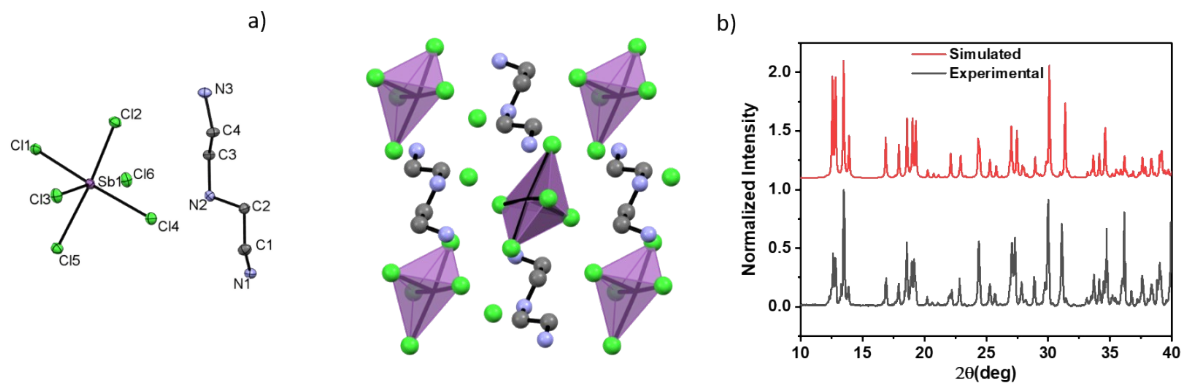

Figure S7: a) SCXRD structure of DETASbCl control hybrid; b) Comparison of simulated and experimental PXRD of DETASbCl control hybrid.

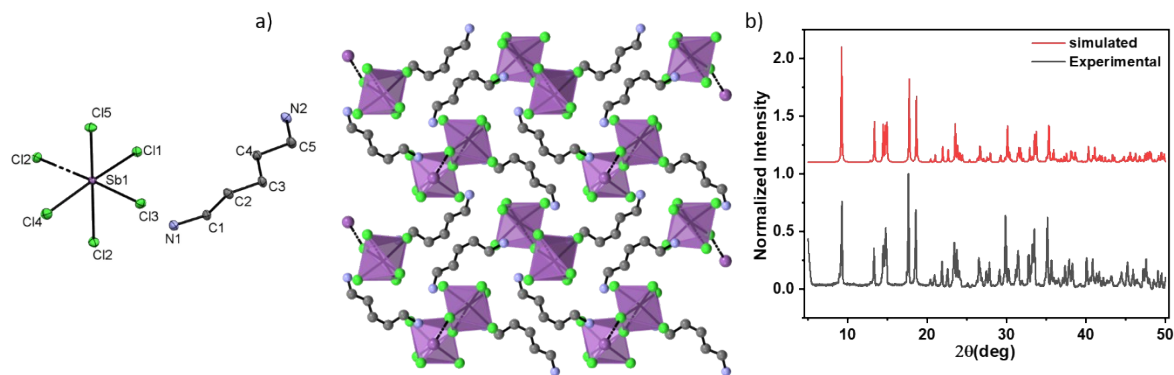

Figure S8: a) SCXRD structure of PDASbCl control hybrid; b) Comparison of simulated and experimental PXRD of PDASbCl control hybrid

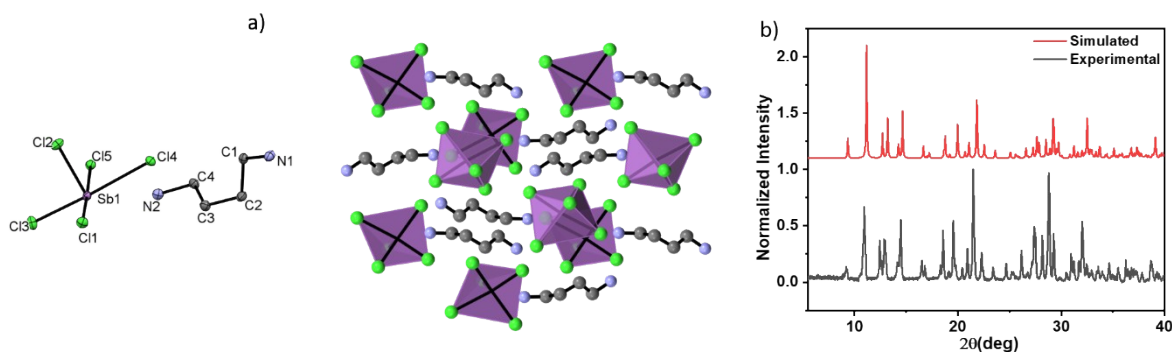

Figure S9: a) SCXRD structure of DABSbCl control hybrid; b) Comparison of simulated and experimental PXRD of DABSbCl control hybrid.

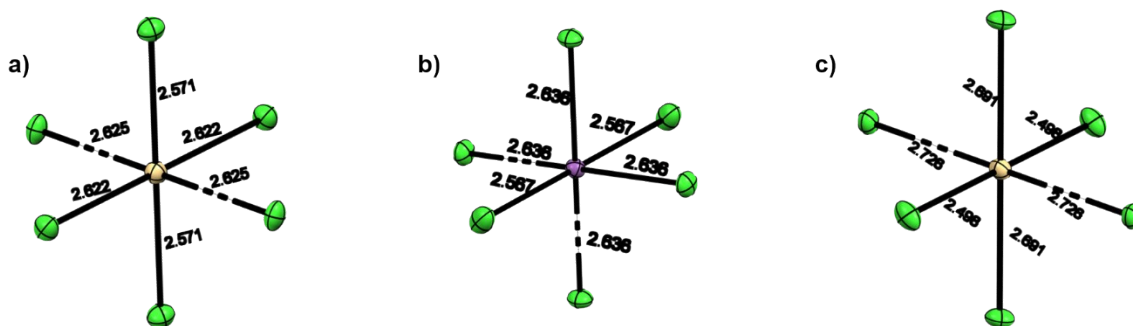

Figure S10. Single crystal XRD structure showing Cd-Cl bond lengths in a) Sb:DETACdCl hybrid, b) Sb:PDACdCl hybrid, c) Sb:DABCdCl hybrid.



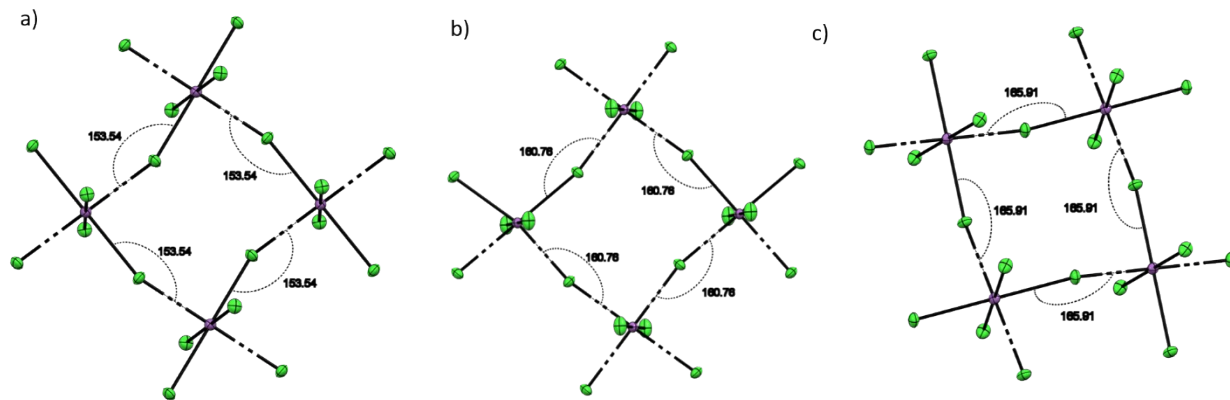

Figure S11: M-X-M bond angles in a) Sb:DETACdCl hybrid, b)Sb:PDACdCl hybrid, c) Sb:DABCdCl hybrid.

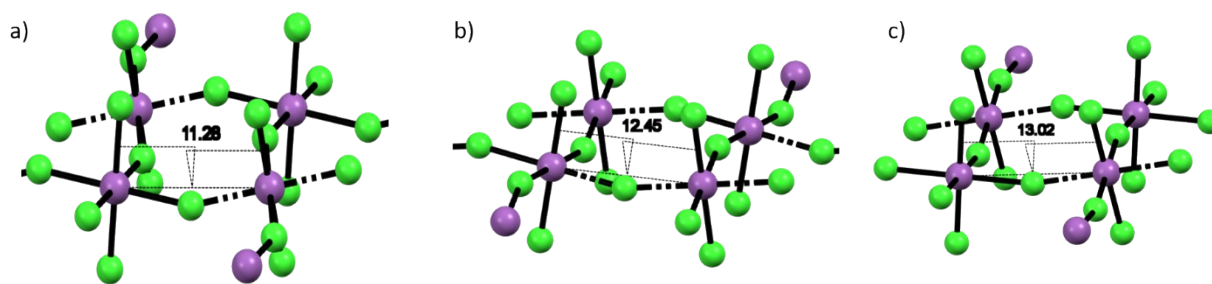

Figure S12: Dihedral angles in a) Sb: DETACdCl hybrid, b) Sb: PDACdCl hybrid, c) Sb:DAbCdCl hybrid.

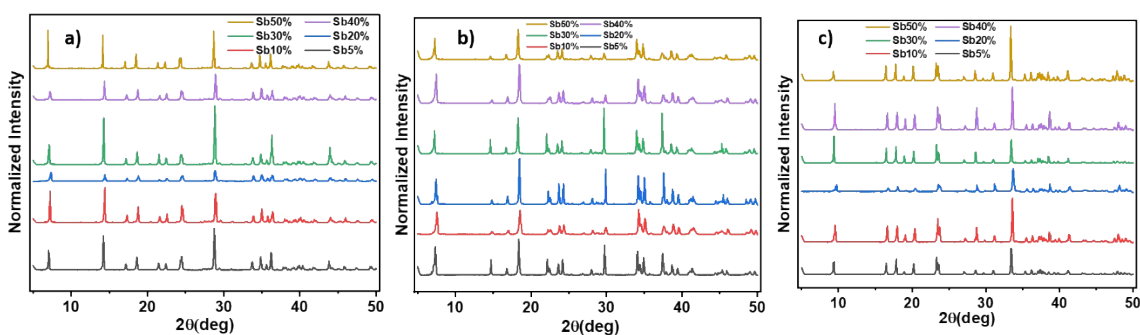

Figure S13: Comparison of PXRD patterns of different Sb feed percentages for a) Sb:DETACdCl hybrid, b) Sb:PDACdCl hybrid, c) Sb:DABCdCl hybrid.

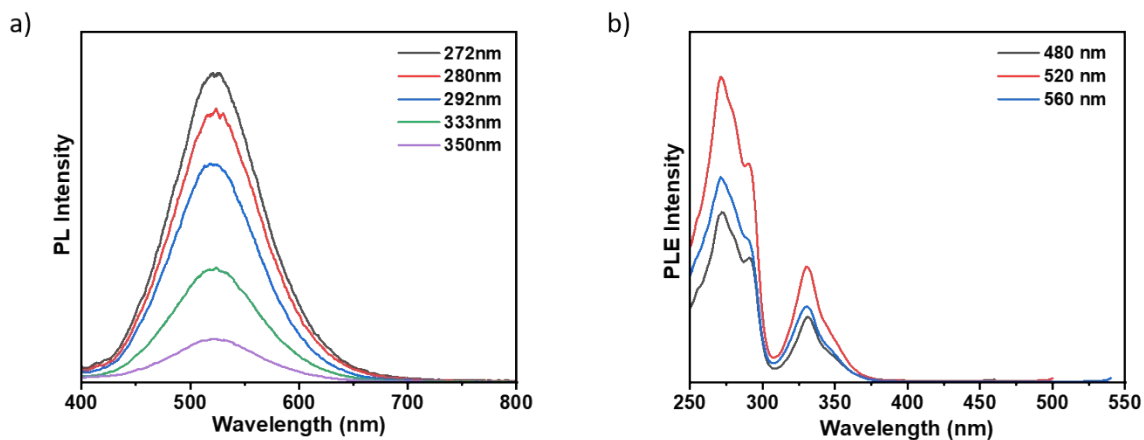

Figure S14: a) Excitation dependent PL, b) Emission dependent PLE of Sb:DETASbCl hybrid.

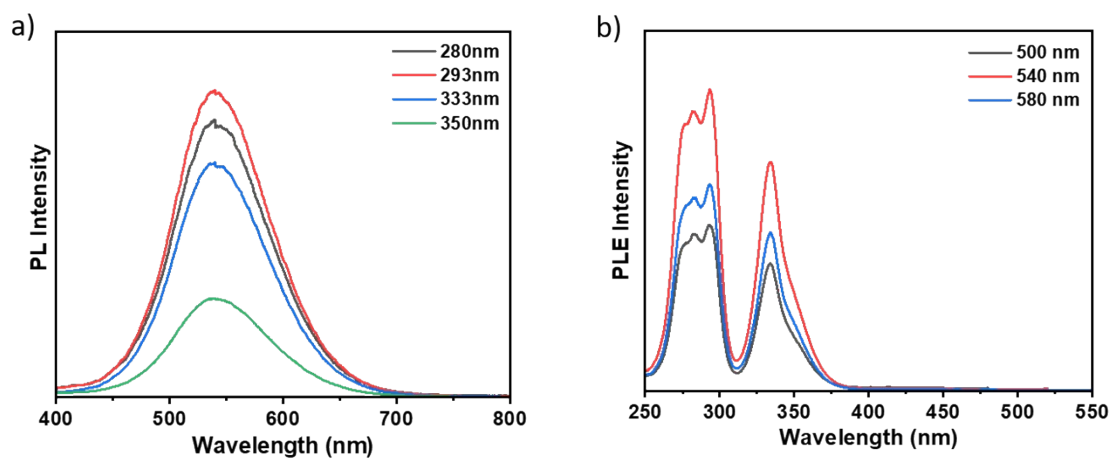

Figure S15: a) Excitation dependent PL, b) Emission dependent PLE of Sb:PDASbCl hybrid.

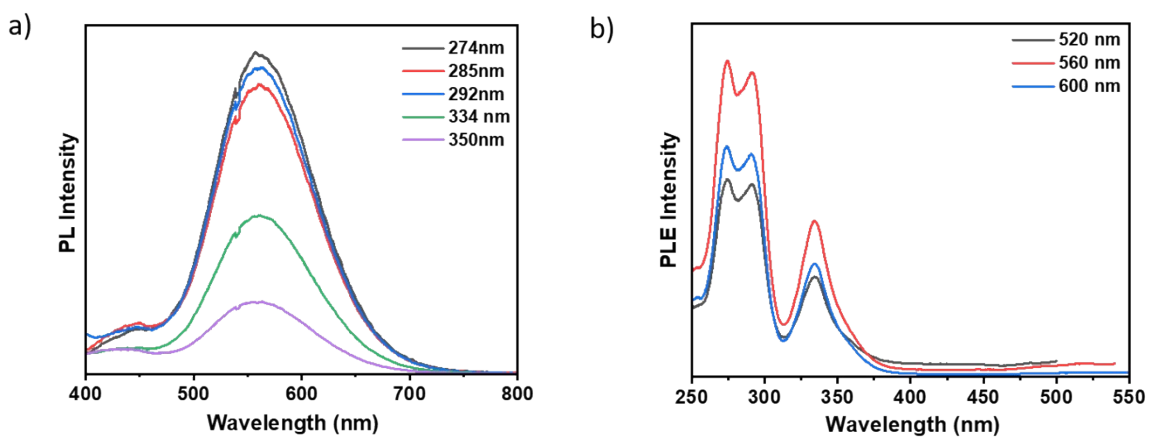

Figure S16: a) Excitation dependent PL, b) Emission dependent PLE of Sb:DABSbCl hybrid.

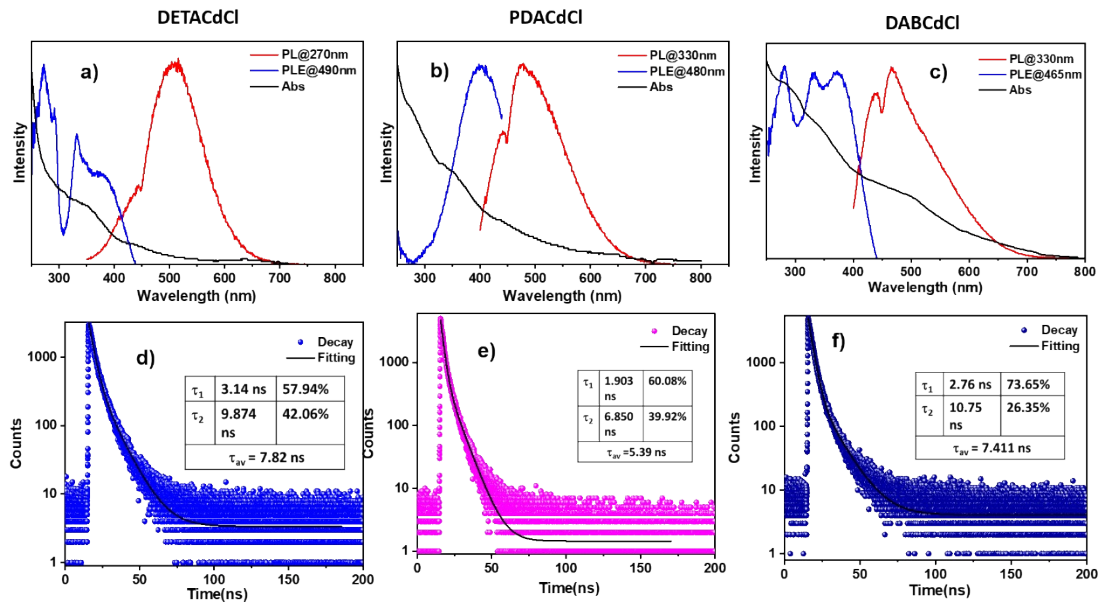

Figure S17: Optical characterization (PL, PLE and Absorption) of host hybrids- a) DETACdCl hybrid, b) PDACdCl hybrid, c) DABCdCl hybrid; Lifetime decay profiles of d) DETACdCl hybrid, e) PDACdCl hybrid, f) DABCdCl hybrid.

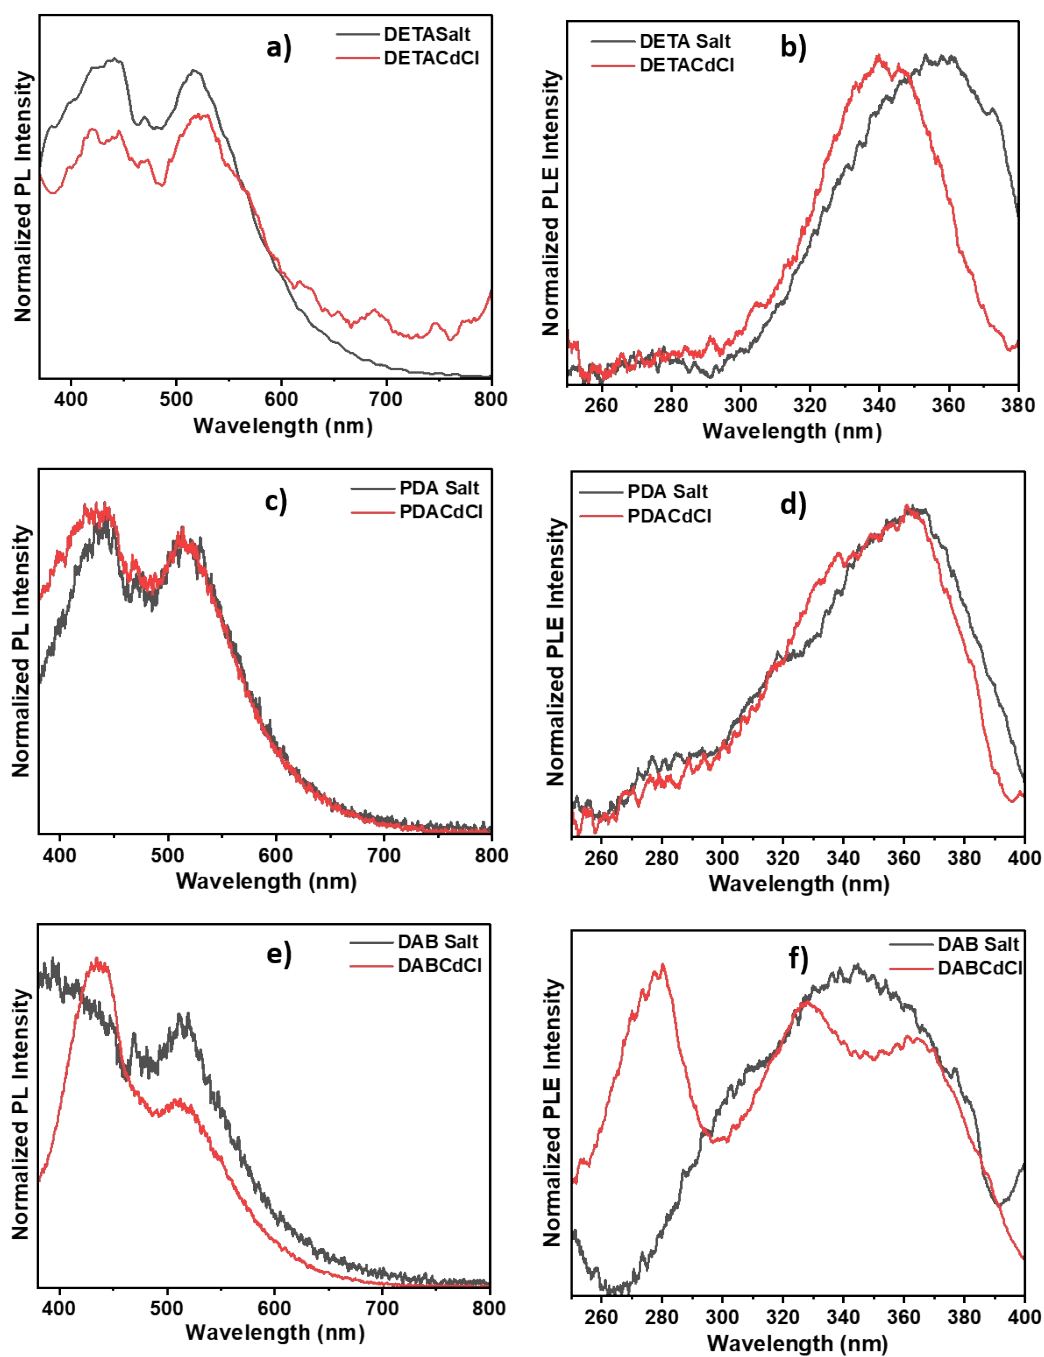

Figure S18: a) PL of DETA salt and DETACdCl excited at 275 nm b) PLE of DETA salt and DETACdCl (Emission: 420 nm) c) PL of PDA salt and PDACdCl excited at 275 nm d) PLE of PDA salt and PDACdCl (Emission: 435 nm) e) PL of DAB salt and DABCdCl excited at 275 nm f) PLE of DAB salt and DABCdCl (Emission: 425 nm)

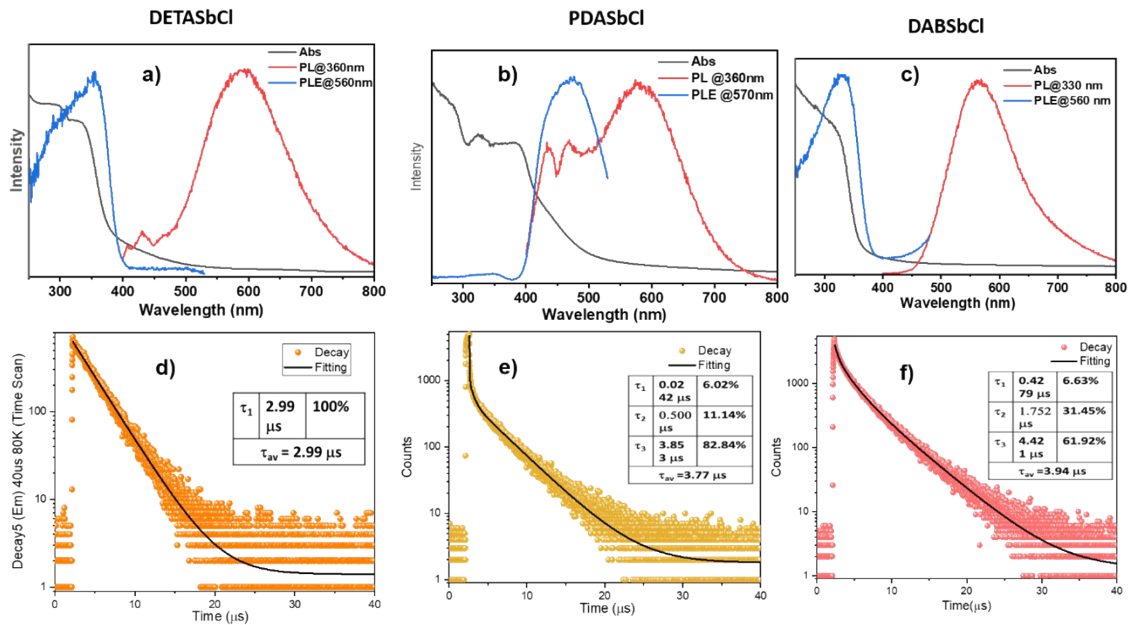

Figure S19: Optical characterization (PL, PLE and Absorption) of Control hybrids- a) DETASbCl hybrid, b) PDASbCl hybrid, c) DABSbCl hybrid; Lifetime decay profiles of d) DETASbCl hybrid, e) PDASbCl hybrid, f) DABSbCl hybrid.

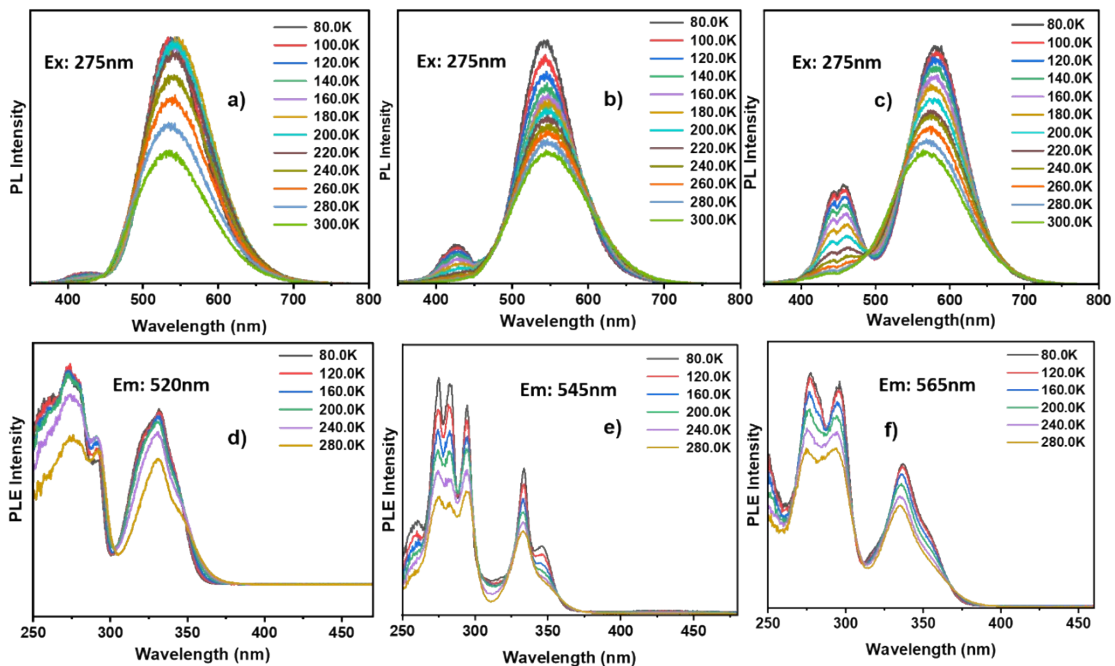

Figure S20: Temperature dependent PL of a) Sb: DETACdCl hybrid, b) Sb:PDACdCl hybrid, c) Sb:DABCdCl hybrid; Temperature dependent PLE of d) Sb:DETACdCl hybrid, e) Sb:PDACdCl hybrid, f) Sb:DABCdCl hybrid.

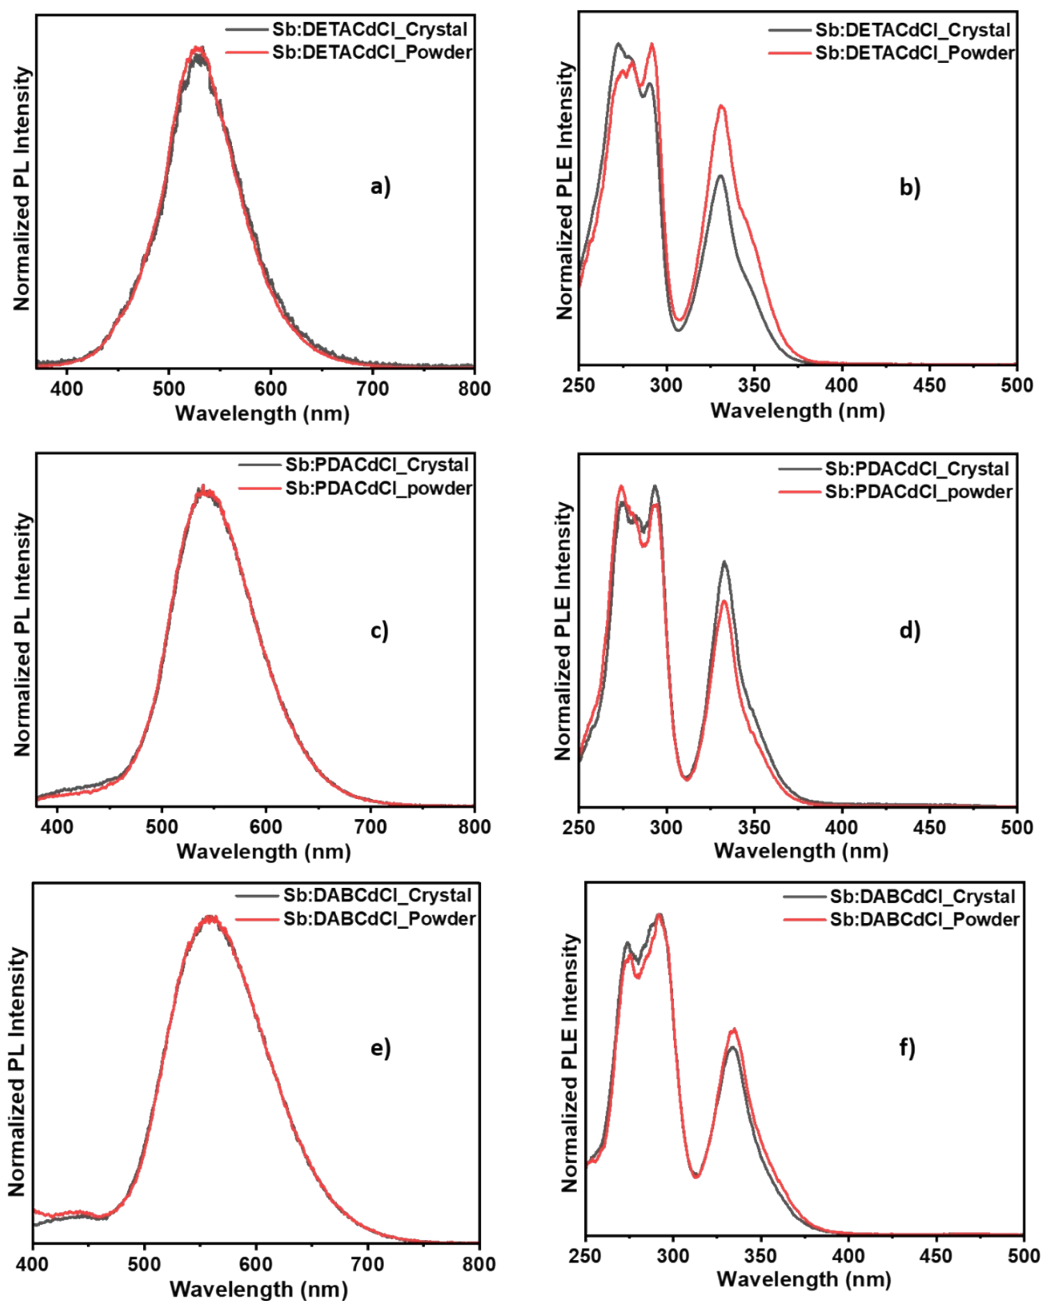

Figure S21: a) PL of Sb:DETACdCl crystal and powder excited at 330 nm b) PLE of Sb:DETACdCl crystal and powder (Emission: 520 nm) c) PL of Sb:PDACdCl crystal and powder excited at 330 nm d) PLE of Sb:PDACdCl crystal and powder (Emission: 540 nm) e) PL of Sb:DABCdCl crystal and powder excited at 330 nm f) PLE of Sb:DABCdCl crystal and powder (Emission: 560 nm).



Table S5: Summary of SCXRD structural analysis and tables of bond lengths, bond angles, dihedral angles for DETACdCl

# DETACdCl

**Table S5-1 Fractional Atomic Coordinates ( $\times 10^4$ ) and Equivalent Isotropic Displacement Parameters ( $\text{\AA}^2 \times 10^3$ ) for DETACdCl.  $U_{\text{eq}}$  is defined as 1/3 of the trace of the orthogonalised  $U_{ij}$  tensor.**

| Atom | x           | y          | z           | U(eq)      |
|------|-------------|------------|-------------|------------|
| Cd1  | 10000       | 5000       | 5000        | 12.48 (7)  |
| Cl1  | 7006.4 (5)  | 4865.5 (2) | 7011.0 (5)  | 17.38 (9)  |
| Cl2  | 10120.2 (5) | 3969.3 (2) | 4508.4 (6)  | 18.02 (9)  |
| Cl3  | 4350.2 (7)  | 2500       | 9655.0 (7)  | 19.18 (11) |
| N1   | 5069 (2)    | 2500       | 5454 (3)    | 14.4 (4)   |
| N2   | 4562 (2)    | 4001.5 (5) | 4828.8 (17) | 17.5 (3)   |
| C1   | 4328 (2)    | 3007.7 (5) | 4628 (2)    | 15.8 (3)   |
| C2   | 5249 (2)    | 3482.3 (6) | 5601 (2)    | 17.2 (3)   |

**Table S5-2 Anisotropic Displacement Parameters ( $\text{\AA}^2 \times 10^3$ ) for DETACdCl. The Anisotropic displacement factor exponent takes the form:  $-2\pi^2[h^2a^{*2}U_{11}+2hka^*b^*U_{12}+\dots]$ .**

| Atom | $U_{11}$   | $U_{22}$   | $U_{33}$   | $U_{23}$   | $U_{13}$   | $U_{12}$   |
|------|------------|------------|------------|------------|------------|------------|
| Cd1  | 11.87 (10) | 13.82 (9)  | 11.74 (10) | -0.29 (5)  | 0.29 (5)   | -0.09 (5)  |
| Cl1  | 14.86 (16) | 22.47 (17) | 14.81 (17) | -1.67 (13) | 4.52 (13)  | -2.36 (13) |
| Cl2  | 20.55 (19) | 14.43 (17) | 19.09 (18) | -0.40 (14) | -0.17 (13) | -0.93 (12) |
| Cl3  | 16.9 (3)   | 23.5 (2)   | 17.1 (2)   | 0          | -0.02 (19) | 0          |
| N1   | 15.5 (9)   | 13.7 (9)   | 14.0 (8)   | 0          | -1.0 (6)   | 0          |
| N2   | 19.8 (6)   | 14.2 (6)   | 18.5 (6)   | -0.3 (5)   | -1.1 (5)   | -0.3 (5)   |
| C1   | 16.7 (7)   | 13.6 (7)   | 17.0 (6)   | 1.0 (5)    | -2.3 (6)   | -0.2 (5)   |
| C2   | 20.5 (7)   | 14.4 (7)   | 16.8 (7)   | -0.1 (6)   | -3.4 (6)   | 0.5 (5)    |

**Table S5-3 Bond Lengths for DETACdCl.**

| Atom | Atom             | Length/ $\text{\AA}$ | Atom | Atom             | Length/ $\text{\AA}$ |
|------|------------------|----------------------|------|------------------|----------------------|
| Cd1  | Cl1              | 2.6226 (3)           | Cd1  | Cl2 <sup>1</sup> | 2.5732 (4)           |
| Cd1  | Cl1 <sup>1</sup> | 2.6226 (3)           | N1   | C1 <sup>4</sup>  | 1.4888 (16)          |
| Cd1  | Cl1 <sup>2</sup> | 2.6249 (3)           | N1   | C1               | 1.4889 (16)          |
| Cd1  | Cl1 <sup>3</sup> | 2.6249 (3)           | N2   | C2               | 1.485 (2)            |
| Cd1  | Cl2              | 2.5731 (4)           | C1   | C2               | 1.521 (2)            |

<sup>1</sup>2-X,1-Y,1-Z; <sup>2</sup>1/2+X,+Y,3/2-Z; <sup>3</sup>2-X,1-Y,-1/2+Z; <sup>4</sup>+X,1/2-Y,+Z

**Table S5-4 Bond Angles for DETACdCl.**

| Atom             | Atom | Atom             | Angle/°      | Atom             | Atom | Atom             | Angle/°      |
|------------------|------|------------------|--------------|------------------|------|------------------|--------------|
| Cl1              | Cd1  | Cl1 <sup>1</sup> | 180.000 (15) | Cl2              | Cd1  | Cl1 <sup>2</sup> | 88.310 (12)  |
| Cl1              | Cd1  | Cl1 <sup>2</sup> | 88.693 (5)   | Cl2 <sup>1</sup> | Cd1  | Cl1 <sup>1</sup> | 88.807 (11)  |
| Cl1              | Cd1  | Cl1 <sup>3</sup> | 91.307 (5)   | Cl2              | Cd1  | Cl1 <sup>3</sup> | 91.690 (12)  |
| Cl1 <sup>3</sup> | Cd1  | Cl1 <sup>2</sup> | 180.0        | Cl2 <sup>1</sup> | Cd1  | Cl1 <sup>3</sup> | 88.310 (12)  |
| Cl1 <sup>1</sup> | Cd1  | Cl1 <sup>2</sup> | 91.307 (5)   | Cl2              | Cd1  | Cl2 <sup>1</sup> | 179.999 (15) |
| Cl1 <sup>1</sup> | Cd1  | Cl1 <sup>3</sup> | 88.693 (5)   | Cd1              | Cl1  | Cd1 <sup>4</sup> | 153.475 (14) |
| Cl2 <sup>1</sup> | Cd1  | Cl1              | 91.193 (11)  | C1 <sup>5</sup>  | N1   | C1               | 114.83 (16)  |
| Cl2              | Cd1  | Cl1              | 88.807 (11)  | N1               | C1   | C2               | 107.88 (12)  |
| Cl2              | Cd1  | Cl1 <sup>1</sup> | 91.194 (11)  | N2               | C2   | C1               | 110.26 (12)  |
| Cl2 <sup>1</sup> | Cd1  | Cl1 <sup>2</sup> | 91.690 (12)  |                  |      |                  |              |

<sup>1</sup>2-X,1-Y,1-Z; <sup>2</sup>1/2+X,+Y,3/2-Z; <sup>3</sup>3/2-X,1-Y,-1/2+Z; <sup>4</sup>3/2-X,1-Y,1/2+Z; <sup>5</sup>+X,1/2-Y,+Z

**Table S5-5 Torsion Angles for DETACdCl.**

| A  | B  | C  | D  | Angle/°     | A               | B  | C  | D  | Angle/°     |
|----|----|----|----|-------------|-----------------|----|----|----|-------------|
| N1 | C1 | C2 | N2 | 179.92 (13) | C1 <sup>1</sup> | N1 | C1 | C2 | 178.97 (11) |

<sup>1</sup>+X,1/2-Y,+Z

**Table S5-6 Hydrogen Atom Coordinates ( $\text{\AA} \times 10^4$ ) and Isotropic Displacement Parameters ( $\text{\AA}^2 \times 10^3$ ) for DETACdCl.**

| Atom | x       | y       | z       | U(eq) |
|------|---------|---------|---------|-------|
| H1A  | 6327.9  | 2499.99 | 5334.81 | 17    |
| H1B  | 4804.68 | 2500    | 6681.86 | 17    |
| H2A  | 4836.48 | 4017.58 | 3604.43 | 21    |
| H2B  | 5119.46 | 4282.3  | 5423.66 | 21    |
| H2C  | 3310.02 | 4022.91 | 4984.66 | 21    |
| H1C  | 2964    | 3025.05 | 4790.04 | 19    |
| H1D  | 4607.97 | 3018.77 | 3291.42 | 19    |
| H2D  | 4971.19 | 3466.6  | 6937.77 | 21    |
| H2E  | 6613.57 | 3459.75 | 5443.93 | 21    |

Table S6: Summary of SCXRD structural analysis and tables of bond lengths, bond angles, dihedral angles for Sb:DETACdCl

# Sb:DETACdCl

**Table S6-1 Fractional Atomic Coordinates ( $\times 10^4$ ) and Equivalent Isotropic Displacement Parameters ( $\text{\AA}^2 \times 10^3$ ) for Sb:DETACdCl.  $U_{\text{eq}}$  is defined as 1/3 of the trace of the orthogonalised  $U_{\text{IJ}}$  tensor.**

| Atom | $x$         | $y$        | $z$         | $U(\text{eq})$ |
|------|-------------|------------|-------------|----------------|
| Cd1  | 10000       | 5000       | 5000        | 13.30 (7)      |
| Cl1  | 7009.6 (4)  | 4864.7 (2) | 7013.7 (4)  | 18.06 (9)      |
| Cl2  | 9879.4 (4)  | 6031.1 (2) | 5492.4 (6)  | 18.72 (9)      |
| Cl3  | 651.1 (7)   | 7500       | 4654.5 (7)  | 19.90 (11)     |
| N1   | 4930 (2)    | 7500       | 4543 (3)    | 15.2 (4)       |
| N2   | 5436 (2)    | 5997.6 (5) | 5170.9 (16) | 18.0 (3)       |
| C2   | 5674 (2)    | 6992.6 (5) | 5373.0 (19) | 16.6 (3)       |
| C1   | 4749.0 (19) | 6516.5 (6) | 4399 (2)    | 17.8 (3)       |
| Sb1  | 10000       | 5000       | 5000        | 13.30 (7)      |

**Table S6-2 Anisotropic Displacement Parameters ( $\text{\AA}^2 \times 10^3$ ) for Sb:DETACdCl. The Anisotropic displacement factor exponent takes the form:  $-2\pi^2[h^2a^2U_{11}+2hka*b*U_{12}+\dots]$ .**

| Atom | $U_{11}$   | $U_{22}$   | $U_{33}$   | $U_{23}$   | $U_{13}$   | $U_{12}$   |
|------|------------|------------|------------|------------|------------|------------|
| Cd1  | 12.58 (10) | 14.66 (10) | 12.66 (10) | -0.33 (4)  | 0.36 (4)   | -0.01 (4)  |
| Cl1  | 15.47 (16) | 23.29 (17) | 15.42 (16) | -1.76 (13) | 4.67 (12)  | -2.48 (13) |
| Cl2  | 21.05 (18) | 15.18 (17) | 19.93 (18) | -0.29 (15) | -0.20 (12) | -0.81 (11) |
| Cl3  | 17.4 (3)   | 24.9 (2)   | 17.5 (2)   | 0          | -0.17 (18) | 0          |
| N1   | 16.5 (9)   | 14.1 (9)   | 14.9 (8)   | 0          | -0.7 (6)   | 0          |
| N2   | 20.7 (6)   | 15.0 (6)   | 18.3 (6)   | -0.3 (4)   | -0.8 (5)   | -0.1 (5)   |
| C2   | 17.5 (7)   | 14.5 (7)   | 17.7 (6)   | 1.1 (5)    | -2.8 (5)   | 0.2 (5)    |
| C1   | 21.1 (7)   | 15.5 (7)   | 17.0 (7)   | -0.2 (6)   | -3.3 (5)   | -0.5 (5)   |
| Sb1  | 12.58 (10) | 14.66 (10) | 12.66 (10) | -0.33 (4)  | 0.36 (4)   | -0.01 (4)  |

**Table S6-3 Bond Lengths for Sb:DETACdCl.**

| Atom | Atom             | Length/ $\text{\AA}$ | Atom | Atom            | Length/ $\text{\AA}$ |
|------|------------------|----------------------|------|-----------------|----------------------|
| Cd1  | Cl1              | 2.6216 (3)           | Cl1  | Sb1             | 2.6216 (3)           |
| Cd1  | Cl1 <sup>1</sup> | 2.6246 (3)           | Cl2  | Sb1             | 2.5713 (4)           |
| Cd1  | Cl1 <sup>2</sup> | 2.6216 (3)           | N1   | C2 <sup>4</sup> | 1.4890 (16)          |
| Cd1  | Cl1 <sup>3</sup> | 2.6246 (3)           | N1   | C2              | 1.4890 (16)          |
| Cd1  | Cl2 <sup>2</sup> | 2.5713 (4)           | N2   | C1              | 1.4826 (19)          |
| Cd1  | Cl2              | 2.5713 (4)           | C2   | C1              | 1.5241 (19)          |

<sup>1</sup>3/2-X,1-Y,-1/2+Z; <sup>2</sup>2-X,1-Y,1-Z; <sup>3</sup>1/2+X,+Y,3/2-Z; <sup>4</sup>+X,3/2-Y,+Z

**Table S6-4 Bond Angles for Sb:DETACdCl.**

| Atom             | Atom | Atom             | Angle/°      | Atom             | Atom | Atom             | Angle/°      |
|------------------|------|------------------|--------------|------------------|------|------------------|--------------|
| Cl1              | Cd1  | Cl1 <sup>1</sup> | 180.0        | N1               | C2   | C1               | 107.71 (12)  |
| Cl1              | Cd1  | Cl1 <sup>2</sup> | 91.328 (5)   | N2               | C1   | C2               | 110.22 (12)  |
| Cl1 <sup>1</sup> | Cd1  | Cl1 <sup>2</sup> | 88.672 (5)   | Cl1              | Sb1  | Cl1 <sup>1</sup> | 180.0        |
| Cl1 <sup>2</sup> | Cd1  | Cl1 <sup>3</sup> | 180.000 (15) | Cl1 <sup>2</sup> | Sb1  | Cl1 <sup>3</sup> | 180.000 (15) |
| Cl1              | Cd1  | Cl1 <sup>3</sup> | 88.672 (5)   | Cl1 <sup>1</sup> | Sb1  | Cl1 <sup>2</sup> | 88.672 (5)   |
| Cl1 <sup>1</sup> | Cd1  | Cl1 <sup>3</sup> | 91.328 (5)   | Cl1              | Sb1  | Cl1 <sup>3</sup> | 88.672 (5)   |
| Cl2              | Cd1  | Cl1 <sup>1</sup> | 88.787 (11)  | Cl1              | Sb1  | Cl1 <sup>2</sup> | 91.328 (5)   |
| Cl2              | Cd1  | Cl1 <sup>2</sup> | 88.275 (11)  | Cl1 <sup>1</sup> | Sb1  | Cl1 <sup>3</sup> | 91.328 (5)   |
| Cl2 <sup>1</sup> | Cd1  | Cl1              | 88.788 (11)  | Cl2 <sup>1</sup> | Sb1  | Cl1              | 88.788 (11)  |
| Cl2              | Cd1  | Cl1              | 91.211 (11)  | Cl2              | Sb1  | Cl1 <sup>2</sup> | 88.275 (11)  |
| Cl2              | Cd1  | Cl1 <sup>3</sup> | 91.725 (11)  | Cl2              | Sb1  | Cl1              | 91.211 (11)  |
| Cl2 <sup>1</sup> | Cd1  | Cl1 <sup>1</sup> | 91.213 (11)  | Cl2 <sup>1</sup> | Sb1  | Cl1 <sup>1</sup> | 91.213 (11)  |
| Cl2 <sup>1</sup> | Cd1  | Cl1 <sup>2</sup> | 91.724 (11)  | Cl2              | Sb1  | Cl1 <sup>1</sup> | 88.787 (11)  |
| Cl2 <sup>1</sup> | Cd1  | Cl1 <sup>3</sup> | 88.275 (11)  | Cl2 <sup>1</sup> | Sb1  | Cl1 <sup>2</sup> | 91.724 (11)  |
| Cl2              | Cd1  | Cl2 <sup>1</sup> | 179.999 (14) | Cl2 <sup>1</sup> | Sb1  | Cl1 <sup>3</sup> | 88.275 (11)  |
| Cd1              | Cl1  | Cd1 <sup>4</sup> | 153.540 (14) | Cl2              | Sb1  | Cl1 <sup>3</sup> | 91.725 (11)  |
| C2 <sup>5</sup>  | N1   | C2               | 114.49 (16)  | Cl2              | Sb1  | Cl2 <sup>1</sup> | 179.999 (14) |

<sup>1</sup>2-X,1-Y,1-Z; <sup>2</sup>3/2-X,1-Y,-1/2+Z; <sup>3</sup>1/2+X,+Y,3/2-Z; <sup>4</sup>3/2-X,1-Y,1/2+Z; <sup>5</sup>+X,3/2-Y,+Z

**Table S6-5 Torsion Angles for Sb:DETACdCl.**

| A  | B  | C  | D  | Angle/°     | A               | B  | C  | D  | Angle/°     |
|----|----|----|----|-------------|-----------------|----|----|----|-------------|
| N1 | C2 | C1 | N2 | 179.93 (12) | C2 <sup>1</sup> | N1 | C2 | C1 | 178.91 (10) |

<sup>1</sup>+X,3/2-Y,+Z

**Table S6-6 Hydrogen Atom Coordinates (Å×10<sup>4</sup>) and Isotropic Displacement Parameters (Å<sup>2</sup>×10<sup>3</sup>) for Sb:DETACdCl.**

| Atom | x       | y       | z       | U(eq) |
|------|---------|---------|---------|-------|
| H1A  | 5195.22 | 7500    | 3315.51 | 18    |
| H1B  | 3671.01 | 7500    | 4662.67 | 18    |
| H2A  | 4891.02 | 5716.38 | 4565.79 | 22    |
| H2B  | 5148.16 | 5979.61 | 6391.76 | 22    |

**Table S6-6 Hydrogen Atom Coordinates ( $\text{\AA}\times 10^4$ ) and Isotropic Displacement Parameters ( $\text{\AA}^2\times 10^3$ ) for Sb:DETACdCl.**

| Atom | <i>x</i> | <i>y</i> | <i>z</i> | U(eq) |
|------|----------|----------|----------|-------|
| H2C  | 6690.85  | 5978.36  | 5028.92  | 22    |
| H2D  | 5395.48  | 6982.11  | 6709.94  | 20    |
| H2E  | 7038.86  | 6975.38  | 5209.82  | 20    |
| H1C  | 3384.81  | 6539.23  | 4557.65  | 21    |
| H1D  | 5026.08  | 6532.04  | 3062.12  | 21    |

**Table S6-7 Atomic Occupancy for Sb:DETACdCl.**

| Atom | Occupancy | Atom | Occupancy | Atom | Occupancy |
|------|-----------|------|-----------|------|-----------|
| Sb1  | 0.0003    |      |           |      |           |

Table S7: Summary of SCXRD structural analysis and tables of bond lengths, bond angles, dihedral angles for DETASbCl

## DETASbCl

**Table S7-1 Fractional Atomic Coordinates ( $\times 10^4$ ) and Equivalent Isotropic Displacement Parameters ( $\text{\AA}^2\times 10^3$ ) for DETASbCl.  $U_{\text{eq}}$  is defined as 1/3 of the trace of the orthogonalised  $U_{ij}$  tensor.**

| Atom | <i>x</i>     | <i>y</i>    | <i>z</i>    | U(eq)     |
|------|--------------|-------------|-------------|-----------|
| Sb01 | 7272.0 (2)   | 7512.4 (2)  | 7633.9 (2)  | 14.18 (4) |
| Cl02 | 10691.5 (5)  | 6155.9 (4)  | 7926.9 (4)  | 19.06 (8) |
| Cl03 | 8582.9 (5)   | 8919.8 (4)  | 4856.1 (4)  | 18.75 (8) |
| Cl04 | 4073.1 (5)   | 8512.8 (4)  | 7603.5 (4)  | 21.87 (9) |
| Cl05 | 7365.9 (6)   | 9545.6 (4)  | 8584.9 (4)  | 22.07 (9) |
| Cl06 | 5873.1 (5)   | 6488.2 (4)  | 10154.2 (4) | 19.60 (8) |
| Cl07 | 7747.0 (6)   | 4666.8 (4)  | 6507.7 (4)  | 22.91 (9) |
| N008 | 7969.3 (18)  | 6893.0 (14) | 3161.7 (14) | 15.0 (3)  |
| N009 | 2808.5 (18)  | 7794.2 (14) | 4835.3 (15) | 19.5 (3)  |
| N00A | 11716.3 (19) | 6671.7 (15) | 556.3 (15)  | 20.5 (3)  |
| C00B | 6062 (2)     | 6666.5 (16) | 3806.4 (17) | 16.2 (3)  |
| C00C | 4649 (2)     | 8053.3 (17) | 3937.9 (18) | 17.9 (3)  |
| C00D | 8374 (2)     | 7677.4 (17) | 1692.5 (17) | 18.3 (3)  |
| C00E | 10282 (2)    | 7954.8 (17) | 1053.2 (18) | 20.6 (3)  |

**Table S7-2 Anisotropic Displacement Parameters ( $\text{\AA}^2 \times 10^3$ ) for DETASbCl. The Anisotropic displacement factor exponent takes the form:  $-2\pi^2[h^2a^2U_{11}+2hka^*b^*U_{12}+\dots]$ .**

| Atom | $U_{11}$   | $U_{22}$   | $U_{33}$   | $U_{23}$   | $U_{13}$    | $U_{12}$   |
|------|------------|------------|------------|------------|-------------|------------|
| Sb01 | 14.89 (6)  | 13.75 (6)  | 15.41 (6)  | -0.82 (4)  | -6.50 (4)   | -4.13 (4)  |
| Cl02 | 17.91 (19) | 18.96 (18) | 21.05 (19) | -4.32 (15) | -7.83 (16)  | -2.20 (15) |
| Cl03 | 20.43 (19) | 17.30 (18) | 19.50 (18) | -3.97 (15) | -6.88 (15)  | -4.42 (15) |
| Cl04 | 16.74 (19) | 24.5 (2)   | 24.8 (2)   | 1.81 (16)  | -9.96 (16)  | -4.05 (15) |
| Cl05 | 29.7 (2)   | 17.41 (19) | 23.6 (2)   | -3.14 (15) | -12.26 (17) | -7.17 (16) |
| Cl06 | 19.43 (19) | 23.77 (19) | 18.31 (18) | 2.10 (15)  | -8.08 (15)  | -9.42 (15) |
| Cl07 | 29.6 (2)   | 21.3 (2)   | 22.1 (2)   | -0.72 (16) | -13.20 (17) | -7.13 (16) |
| N008 | 14.7 (6)   | 15.2 (6)   | 16.2 (6)   | -1.3 (5)   | -6.9 (5)    | -2.7 (5)   |
| N009 | 15.5 (7)   | 16.7 (7)   | 24.7 (7)   | -3.0 (6)   | -5.5 (6)    | -2.4 (5)   |
| N00A | 14.3 (7)   | 27.5 (8)   | 18.5 (7)   | -1.7 (6)   | -5.2 (6)    | -3.9 (6)   |
| C00B | 13.5 (7)   | 14.9 (7)   | 18.7 (8)   | 0.1 (6)    | -4.7 (6)    | -3.4 (6)   |
| C00C | 12.4 (7)   | 16.2 (8)   | 22.1 (8)   | -0.6 (6)   | -3.6 (6)    | -2.5 (6)   |
| C00D | 15.5 (8)   | 19.7 (8)   | 16.7 (8)   | 2.0 (6)    | -5.1 (6)    | -2.5 (6)   |
| C00E | 20.1 (8)   | 19.3 (8)   | 22.4 (8)   | -2.4 (7)   | -4.5 (7)    | -8.3 (7)   |

**Table S7-3 Bond Lengths for DETASbCl.**

| Atom Atom | Length/ $\text{\AA}$ | Atom Atom | Length/ $\text{\AA}$ |
|-----------|----------------------|-----------|----------------------|
| Sb01 Cl02 | 2.8306 (4)           | N008 C00D | 1.494 (2)            |
| Sb01 Cl03 | 2.8230 (4)           | N009 C00C | 1.488 (2)            |
| Sb01 Cl04 | 2.5201 (4)           | N00A C00E | 1.482 (2)            |
| Sb01 Cl05 | 2.4100 (4)           | C00B C00C | 1.521 (2)            |
| Sb01 Cl06 | 2.4904 (4)           | C00D C00E | 1.518 (2)            |
| N008 C00B | 1.4981 (19)          |           |                      |

**Table S7-4 Bond Angles for DETASbCl.**

| Atom Atom Atom | Angle/ $^\circ$ | Atom Atom Atom | Angle/ $^\circ$ |
|----------------|-----------------|----------------|-----------------|
| Cl03 Sb01 Cl02 | 98.139 (12)     | Cl06 Sb01 Cl03 | 174.276 (13)    |
| Cl04 Sb01 Cl02 | 173.306 (12)    | Cl06 Sb01 Cl04 | 87.594 (13)     |
| Cl04 Sb01 Cl03 | 88.203 (12)     | C00D N008 C00B | 113.49 (12)     |
| Cl05 Sb01 Cl02 | 88.714 (13)     | N008 C00B C00C | 111.24 (13)     |
| Cl05 Sb01 Cl03 | 86.090 (13)     | N009 C00C C00B | 108.99 (13)     |
| Cl05 Sb01 Cl04 | 93.878 (15)     | N008 C00D C00E | 113.84 (13)     |
| Cl05 Sb01 Cl06 | 90.320 (14)     | N00A C00E C00D | 112.38 (13)     |
| Cl06 Sb01 Cl02 | 86.220 (13)     |                |                 |



**Table S7-5 Torsion Angles for DETASbCl.**

| A    | B    | C    | D    | Angle/°     | A    | B    | C    | D    | Angle/°     |
|------|------|------|------|-------------|------|------|------|------|-------------|
| N008 | C00B | C00C | N009 | 169.15 (13) | C00B | N008 | C00D | C00E | 178.04 (13) |
| N008 | C00D | C00E | N00A | 73.19 (18)  | C00D | N008 | C00B | C00C | -58.02 (17) |

**Table S7-6 Hydrogen Atom Coordinates ( $\text{\AA} \times 10^4$ ) and Isotropic Displacement Parameters ( $\text{\AA}^2 \times 10^3$ ) for DETASbCl.**

| Atom | x        | y       | z       | U(eq) |
|------|----------|---------|---------|-------|
| H00A | 8143.48  | 7375.77 | 3774.07 | 18    |
| H00B | 8776.11  | 6044.38 | 3090.74 | 18    |
| H00C | 2584.56  | 7129.29 | 4448.14 | 23    |
| H00D | 1943.2   | 8603.95 | 4845.35 | 23    |
| H00E | 2772.09  | 7491    | 5761.13 | 23    |
| H00F | 11410.32 | 6244.74 | -23.46  | 25    |
| H00G | 11812.04 | 6074.83 | 1342.31 | 25    |
| H00H | 12806.96 | 6907.97 | 44.98   | 25    |
| H00I | 5877.42  | 6158.92 | 4782.27 | 19    |
| H00J | 5892.01  | 6078.87 | 3184.94 | 19    |
| H00K | 4947.49  | 8712.6  | 4401.17 | 21    |
| H00L | 4658.33  | 8477.83 | 2958.76 | 21    |
| H00M | 7467.25  | 8585.88 | 1764.09 | 22    |
| H00N | 8224.49  | 7135.24 | 1019.04 | 22    |
| H00O | 10344.63 | 8671.72 | 219.35  | 25    |
| H00P | 10523.12 | 8336.08 | 1797.09 | 25    |

**Table S8:** Summary of SCXRD structural analysis and tables of bond lengths, bond angles, dihedral angles for PDACdCl

## PDACdCl

**Table S8-1 Fractional Atomic Coordinates ( $\times 10^4$ ) and Equivalent Isotropic Displacement Parameters ( $\text{\AA}^2 \times 10^3$ ) for PDACdCl.  $U_{\text{eq}}$  is defined as 1/3 of the trace of the orthogonalised  $U_{\text{ij}}$  tensor.**

| Atom | x    | y           | z           | U(eq)      |
|------|------|-------------|-------------|------------|
| Cd1  | 5000 | 5000        | 5000        | 12.63 (16) |
| Cl1  | 5000 | 6053.2 (3)  | 4467.5 (12) | 25.3 (2)   |
| Cl2  | 7500 | 5110 (20)   | 7500        | 50 (20)    |
| N1   | 5000 | 5945.5 (16) | 205 (4)     | 44.7 (13)  |
| C3   | 5000 | 7500        | -659 (8)    | 45.6 (16)  |

**Table S8-1 Fractional Atomic Coordinates ( $\times 10^4$ ) and Equivalent Isotropic Displacement Parameters ( $\text{\AA}^2 \times 10^3$ ) for PDACdCl.  $U_{\text{eq}}$  is defined as 1/3 of the trace of the orthogonalised  $U_{ij}$  tensor.**

| Atom | <i>x</i> | <i>y</i>    | <i>z</i> | $U(\text{eq})$ |
|------|----------|-------------|----------|----------------|
| C2   | 5000     | 6974.2 (19) | 206 (6)  | 70 (3)         |
| C1   | 5000     | 6459.7 (16) | -666 (5) | 51.6 (13)      |
| Cl3  | 7783 (7) | 5140.1 (19) | 7211 (6) | 15.5 (10)      |

**Table S8-2 Anisotropic Displacement Parameters ( $\text{\AA}^2 \times 10^3$ ) for PDACdCl. The Anisotropic displacement factor exponent takes the form:  $-2\pi^2[h^2a^{*2}U_{11}+2hka^*b^*U_{12}+\dots]$ .**

| Atom | $U_{11}$  | $U_{22}$  | $U_{33}$  | $U_{23}$  | $U_{13}$  | $U_{12}$ |
|------|-----------|-----------|-----------|-----------|-----------|----------|
| Cd1  | 11.4 (2)  | 15.2 (2)  | 11.3 (2)  | 0.49 (9)  | 0         | 0        |
| Cl1  | 42.6 (5)  | 15.8 (4)  | 17.7 (4)  | 0.6 (3)   | 0         | 0        |
| Cl2  | 50 (30)   | 60 (30)   | 50 (40)   | 0         | -40 (30)  | 0        |
| N1   | 100 (4)   | 13.5 (17) | 20.5 (15) | 0.3 (11)  | 0         | 0        |
| C3   | 93 (5)    | 19 (3)    | 25 (3)    | 0         | 0         | 0        |
| C2   | 168 (9)   | 15 (2)    | 26 (2)    | -1.2 (15) | 0         | 0        |
| C1   | 117 (4)   | 17.0 (17) | 20.5 (18) | 1.6 (15)  | 0         | 0        |
| Cl3  | 14.7 (17) | 19.3 (12) | 12.5 (16) | -0.1 (6)  | -3.1 (12) | -0.5 (6) |

**Table S8-3 Bond Lengths for PDACdCl.**

| Atom Atom            | Length/ $\text{\AA}$ | Atom Atom            | Length/ $\text{\AA}$ |
|----------------------|----------------------|----------------------|----------------------|
| Cd1 Cl1 <sup>1</sup> | 2.5657 (8)           | Cd1 Cl3              | 2.635 (5)            |
| Cd1 Cl1              | 2.5658 (8)           | Cd1 Cl3 <sup>6</sup> | 2.653 (5)            |
| Cd1 Cl2 <sup>2</sup> | 2.618 (5)            | Cd1 Cl3 <sup>7</sup> | 2.635 (5)            |
| Cd1 Cl2 <sup>1</sup> | 2.618 (5)            | N1 C1                | 1.397 (5)            |
| Cd1 Cl2              | 2.618 (6)            | C3 C2                | 1.420 (5)            |
| Cd1 Cl2 <sup>3</sup> | 2.618 (6)            | C3 C2 <sup>8</sup>   | 1.420 (5)            |
| Cd1 Cl3 <sup>1</sup> | 2.635 (5)            | C2 C1                | 1.398 (6)            |
| Cd1 Cl3 <sup>4</sup> | 2.653 (5)            | Cl3 Cl3 <sup>4</sup> | 0.596 (10)           |
| Cd1 Cl3 <sup>5</sup> | 2.635 (5)            |                      |                      |

<sup>1</sup>1-X,1-Y,1-Z; <sup>2</sup>-1/2+X,+Y,3/2-Z; <sup>3</sup>3/2-X,1-Y,-1/2+Z; <sup>4</sup>3/2-X,+Y,3/2-Z; <sup>5</sup>+X,1-Y,1-Z; <sup>6</sup>-1/2+X,1-Y,-1/2+Z; <sup>7</sup>1-X,+Y,+Z; <sup>8</sup>1-X,3/2-Y,+Z

**Table S8-4 Bond Angles for PDACdCl.**

| Atom Atom Atom           | Angle/ $^\circ$ | Atom Atom Atom                        | Angle/ $^\circ$ |
|--------------------------|-----------------|---------------------------------------|-----------------|
| Cl1 <sup>1</sup> Cd1 Cl1 | 180.0           | Cl2 <sup>3</sup> Cd1 Cl3 <sup>5</sup> | 98.38 (16)      |

**Table S8-4 Bond Angles for PDACdCl.**

| Atom             | Atom | Atom             | Angle/°    | Atom             | Atom | Atom             | Angle/°    |
|------------------|------|------------------|------------|------------------|------|------------------|------------|
| Cl1              | Cd1  | Cl2              | 90.7 (12)  | Cl2 <sup>2</sup> | Cd1  | Cl3 <sup>5</sup> | 81.62 (16) |
| Cl1 <sup>1</sup> | Cd1  | Cl2 <sup>1</sup> | 90.7 (12)  | Cl2 <sup>3</sup> | Cd1  | Cl3 <sup>6</sup> | 6.7 (4)    |
| Cl1 <sup>1</sup> | Cd1  | Cl2 <sup>2</sup> | 89.3 (12)  | Cl2 <sup>3</sup> | Cd1  | Cl3 <sup>4</sup> | 81.62 (16) |
| Cl1              | Cd1  | Cl2 <sup>2</sup> | 90.7 (12)  | Cl2 <sup>2</sup> | Cd1  | Cl3 <sup>7</sup> | 6.7 (4)    |
| Cl1 <sup>1</sup> | Cd1  | Cl2 <sup>3</sup> | 90.7 (12)  | Cl2 <sup>1</sup> | Cd1  | Cl3 <sup>5</sup> | 173.3 (3)  |
| Cl1 <sup>1</sup> | Cd1  | Cl2              | 89.3 (12)  | Cl2 <sup>2</sup> | Cd1  | Cl3 <sup>6</sup> | 173.3 (4)  |
| Cl1              | Cd1  | Cl2 <sup>1</sup> | 89.3 (12)  | Cl2 <sup>1</sup> | Cd1  | Cl3 <sup>4</sup> | 6.7 (3)    |
| Cl1              | Cd1  | Cl2 <sup>3</sup> | 89.3 (12)  | Cl2              | Cd1  | Cl3 <sup>6</sup> | 85.50 (19) |
| Cl1              | Cd1  | Cl3 <sup>4</sup> | 90.26 (10) | Cl2 <sup>2</sup> | Cd1  | Cl3 <sup>4</sup> | 98.38 (16) |
| Cl1              | Cd1  | Cl3 <sup>5</sup> | 89.74 (10) | Cl2 <sup>2</sup> | Cd1  | Cl3 <sup>1</sup> | 85.50 (19) |
| Cl1              | Cd1  | Cl3 <sup>6</sup> | 91.70 (10) | Cl2              | Cd1  | Cl3 <sup>5</sup> | 6.7 (3)    |
| Cl1 <sup>1</sup> | Cd1  | Cl3 <sup>5</sup> | 90.26 (10) | Cl2 <sup>1</sup> | Cd1  | Cl3 <sup>6</sup> | 94.50 (19) |
| Cl1 <sup>1</sup> | Cd1  | Cl3 <sup>6</sup> | 88.30 (10) | Cl2 <sup>1</sup> | Cd1  | Cl3 <sup>7</sup> | 85.50 (19) |
| Cl1              | Cd1  | Cl3 <sup>7</sup> | 88.30 (10) | Cl2 <sup>3</sup> | Cd1  | Cl3 <sup>7</sup> | 173.3 (4)  |
| Cl1 <sup>1</sup> | Cd1  | Cl3 <sup>7</sup> | 91.70 (10) | Cl2 <sup>1</sup> | Cd1  | Cl3 <sup>1</sup> | 6.7 (4)    |
| Cl1              | Cd1  | Cl3              | 88.29 (10) | Cl2 <sup>3</sup> | Cd1  | Cl3 <sup>1</sup> | 94.50 (19) |
| Cl1 <sup>1</sup> | Cd1  | Cl3              | 91.71 (10) | Cl2              | Cd1  | Cl3 <sup>4</sup> | 173.3 (3)  |
| Cl1              | Cd1  | Cl3 <sup>1</sup> | 91.70 (10) | Cl3 <sup>6</sup> | Cd1  | Cl3              | 79.3 (2)   |
| Cl1 <sup>1</sup> | Cd1  | Cl3 <sup>1</sup> | 88.30 (10) | Cl3 <sup>7</sup> | Cd1  | Cl3              | 100.7 (2)  |
| Cl1 <sup>1</sup> | Cd1  | Cl3 <sup>4</sup> | 89.74 (10) | Cl3 <sup>1</sup> | Cd1  | Cl3 <sup>7</sup> | 79.3 (2)   |
| Cl2              | Cd1  | Cl2 <sup>2</sup> | 88.2 (2)   | Cl3 <sup>1</sup> | Cd1  | Cl3              | 180.0      |
| Cl2              | Cd1  | Cl2 <sup>1</sup> | 180.0      | Cd1              | Cl2  | Cd1 <sup>8</sup> | 169 (2)    |
| Cl2              | Cd1  | Cl2 <sup>3</sup> | 91.8 (2)   | C2               | C3   | C2 <sup>9</sup>  | 126.0 (5)  |
| Cl2 <sup>1</sup> | Cd1  | Cl2 <sup>3</sup> | 88.2 (2)   | C1               | C2   | C3               | 125.3 (4)  |
| Cl2 <sup>2</sup> | Cd1  | Cl2 <sup>3</sup> | 180.0      | N1               | C1   | C2               | 124.7 (3)  |
| Cl2 <sup>1</sup> | Cd1  | Cl2 <sup>2</sup> | 91.8 (2)   | Cd1              | Cl3  | Cd1 <sup>8</sup> | 160.4 (2)  |
| Cl2              | Cd1  | Cl3 <sup>7</sup> | 94.50 (19) | Cl3 <sup>5</sup> | Cl3  | Cd1              | 85.3 (10)  |
| Cl2              | Cd1  | Cl3 <sup>1</sup> | 173.3 (4)  |                  |      |                  |            |

<sup>1</sup>1-X,1-Y,1-Z; <sup>2</sup>-1/2+X,+Y,3/2-Z; <sup>3</sup>3/2-X,1-Y,-1/2+Z; <sup>4</sup>-1/2+X,1-Y,-1/2+Z; <sup>5</sup>3/2-X,+Y,3/2-Z; <sup>6</sup>+X,1-Y,1-Z; <sup>7</sup>1-X,+Y,+Z; <sup>8</sup>3/2-X,1-Y,1/2+Z; <sup>9</sup>1-X,3/2-Y,+Z

**Table S8-5 Torsion Angles for PDACdCl.**

| A  | B  | C  | D  | Angle/°     | A               | B  | C  | D  | Angle/°     |
|----|----|----|----|-------------|-----------------|----|----|----|-------------|
| C3 | C2 | C1 | N1 | 180.000 (2) | C2 <sup>1</sup> | C3 | C2 | C1 | 180.000 (3) |

<sup>1</sup>1-X,3/2-Y,+Z

**Table S8-6 Hydrogen Atom Coordinates ( $\text{\AA} \times 10^4$ ) and Isotropic Displacement Parameters ( $\text{\AA}^2 \times 10^3$ ) for PDACdCl.**

| Atom | <i>x</i> | <i>y</i> | <i>z</i> | U(eq) |
|------|----------|----------|----------|-------|
| H1A  | 3832.17  | 5813.14  | 265.73   | 67    |
| H1B  | 5455.9   | 5986.49  | 1334.37  | 67    |
| H1C  | 5711.94  | 5702.13  | -418.58  | 67    |
| H3B  | 3913.77  | 7500     | -1457.2  | 55    |
| H3A  | 6086.23  | 7500     | -1457.2  | 55    |
| H2B  | 6086.78  | 6972.71  | 1003.62  | 83    |
| H2A  | 3913.22  | 6972.71  | 1003.61  | 83    |
| H1D  | 3912.68  | 6459.74  | -1462.42 | 62    |
| H1E  | 6087.32  | 6459.74  | -1462.42 | 62    |

**Table S8-7 Atomic Occupancy for PDACdCl.**

| Atom | Occupancy | Atom | Occupancy | Atom | Occupancy |
|------|-----------|------|-----------|------|-----------|
| Cl2  | 0.1       | H1A  | 0.5       | H1B  | 0.5       |
| H1C  | 0.5       | H3B  | 0.5       | H3A  | 0.5       |
| H2B  | 0.5       | H2A  | 0.5       | H1D  | 0.5       |
| H1E  | 0.5       | Cl3  | 0.45      |      |           |

Table S9: Summary of SCXRD structural analysis and tables of bond lengths, bond angles, dihedral angles for Sb:PDACdCl

## Sb:PDACdCl

**Table S9-1 Fractional Atomic Coordinates ( $\times 10^4$ ) and Equivalent Isotropic Displacement Parameters ( $\text{\AA}^2 \times 10^3$ ) for Sb:PDACdCl.  $U_{\text{eq}}$  is defined as 1/3 of the trace of the orthogonalised  $U_{\text{IJ}}$  tensor.**

| Atom | <i>x</i> | <i>y</i> | <i>z</i> | U(eq)   |
|------|----------|----------|----------|---------|
| Cd01 | 5000     | 5000     | 0        | 13.0(2) |

**Table S9-1 Fractional Atomic Coordinates ( $\times 10^4$ ) and Equivalent Isotropic Displacement Parameters ( $\text{\AA}^2 \times 10^3$ ) for Sb:PDACdCl.  $U_{eq}$  is defined as 1/3 of the trace of the orthogonalised  $U_{IJ}$  tensor.**

| Atom | x        | y          | z          | U(eq)     |
|------|----------|------------|------------|-----------|
| Cl02 | 5000     | 6053.8 (5) | 531.1 (17) | 25.3 (3)  |
| N004 | 5000     | 5946 (2)   | 4803 (6)   | 46.3 (19) |
| C005 | 5000     | 7500       | 5644 (12)  | 48 (3)    |
| C006 | 5000     | 6975 (3)   | 4787 (9)   | 70 (4)    |
| C007 | 5000     | 6460 (2)   | 5661 (8)   | 54 (2)    |
| Sb01 | 5000     | 5000       | 0          | 13.0 (2)  |
| Cl1  | 7781 (3) | 4863.0 (6) | 2217 (3)   | 18.2 (5)  |

**Table S9-2 Anisotropic Displacement Parameters ( $\text{\AA}^2 \times 10^3$ ) for Sb:PDACdCl. The Anisotropic displacement factor exponent takes the form:  $-2\pi^2[h^2a^{*2}U_{11}+2hka^*b^*U_{12}+\dots]$ .**

| Atom | $U_{11}$  | $U_{22}$ | $U_{33}$  | $U_{23}$   | $U_{13}$ | $U_{12}$ |
|------|-----------|----------|-----------|------------|----------|----------|
| Cd01 | 12.4 (3)  | 13.5 (3) | 13.2 (3)  | -0.49 (13) | 0        | 0        |
| Cl02 | 41.8 (7)  | 14.2 (5) | 19.8 (6)  | -0.9 (4)   | 0        | 0        |
| N004 | 103 (6)   | 14 (3)   | 22 (2)    | 2.9 (17)   | 0        | 0        |
| C005 | 100 (8)   | 16 (4)   | 28 (4)    | 0          | 0        | 0        |
| C006 | 165 (13)  | 16 (4)   | 29 (3)    | -2 (2)     | 0        | 0        |
| C007 | 125 (7)   | 15 (2)   | 22 (3)    | 0 (2)      | 0        | 0        |
| Sb01 | 12.4 (3)  | 13.5 (3) | 13.2 (3)  | -0.49 (13) | 0        | 0        |
| Cl1  | 15.4 (16) | 21.9 (6) | 17.3 (16) | 0.3 (6)    | -5.8 (9) | 0.7 (6)  |

**Table S9-3 Bond Lengths for Sb:PDACdCl.**

| Atom Atom              | Length/ $\text{\AA}$ | Atom Atom              | Length/ $\text{\AA}$ |
|------------------------|----------------------|------------------------|----------------------|
| Cd01 Cl02 <sup>1</sup> | 2.5669 (11)          | C005 C006              | 1.415 (7)            |
| Cd01 Cl02              | 2.5669 (11)          | C005 C006 <sup>8</sup> | 1.415 (7)            |
| Cd01 Cl1 <sup>2</sup>  | 2.650 (3)            | C006 C007              | 1.400 (9)            |
| Cd01 Cl1 <sup>3</sup>  | 2.650 (3)            | Sb01 Cl1 <sup>1</sup>  | 2.636 (3)            |
| Cd01 Cl1 <sup>1</sup>  | 2.636 (3)            | Sb01 Cl1 <sup>7</sup>  | 2.636 (3)            |
| Cd01 Cl1 <sup>4</sup>  | 2.650 (3)            | Sb01 Cl1 <sup>6</sup>  | 2.650 (3)            |
| Cd01 Cl1 <sup>5</sup>  | 2.636 (3)            | Sb01 Cl1 <sup>2</sup>  | 2.650 (3)            |
| Cd01 Cl1 <sup>6</sup>  | 2.650 (3)            | Sb01 Cl1               | 2.636 (3)            |
| Cd01 Cl1               | 2.636 (3)            | Sb01 Cl1 <sup>4</sup>  | 2.650 (3)            |
| Cd01 Cl1 <sup>7</sup>  | 2.636 (3)            | Sb01 Cl1 <sup>5</sup>  | 2.636 (3)            |
| Cl02 Sb01              | 2.5669 (11)          | Sb01 Cl1 <sup>3</sup>  | 2.650 (3)            |
| N004 C007              | 1.394 (8)            | Cl1 Cl1 <sup>2</sup>   | 0.588 (3)            |

<sup>1</sup>1-X,1-Y,-Z; <sup>2</sup>3/2-X,+Y,1/2-Z; <sup>3</sup>-1/2+X,+Y,1/2-Z; <sup>4</sup>3/2-X,1-Y,-1/2+Z; <sup>5</sup>1-X,+Y,+Z; <sup>6</sup>-1/2+X,1-Y,-1/2+Z; <sup>7</sup>+X,1-Y,-Z; <sup>8</sup>1-X,3/2-Y,+Z

**Table S9-4 Bond Angles for Sb:PDACdCl.**

| Atom Atom Atom                          | Angle/°     | Atom Atom Atom                          | Angle/°     |
|-----------------------------------------|-------------|-----------------------------------------|-------------|
| Cl02 <sup>1</sup> Cd01 Cl02             | 180.0       | Cl02 Sb01 Cl1 <sup>6</sup>              | 91.55 (4)   |
| Cl02 <sup>1</sup> Cd01 Cl1 <sup>2</sup> | 90.14 (4)   | Cl02 Sb01 Cl1 <sup>7</sup>              | 88.45 (4)   |
| Cl02 Cd01 Cl1 <sup>3</sup>              | 90.14 (4)   | Cl02 <sup>1</sup> Sb01 Cl1 <sup>5</sup> | 90.14 (4)   |
| Cl02 Cd01 Cl1                           | 91.55 (4)   | Cl02 <sup>1</sup> Sb01 Cl1 <sup>7</sup> | 91.55 (4)   |
| Cl02 Cd01 Cl1 <sup>4</sup>              | 90.14 (4)   | Cl02 Sb01 Cl1 <sup>2</sup>              | 89.86 (4)   |
| Cl02 <sup>1</sup> Cd01 Cl1 <sup>3</sup> | 89.86 (4)   | Cl02 Sb01 Cl1 <sup>5</sup>              | 89.86 (4)   |
| Cl02 Cd01 Cl1 <sup>5</sup>              | 89.86 (4)   | Cl02 Sb01 Cl1 <sup>3</sup>              | 90.14 (4)   |
| Cl02 <sup>1</sup> Cd01 Cl1 <sup>1</sup> | 91.55 (4)   | Cl02 <sup>1</sup> Sb01 Cl1 <sup>4</sup> | 89.86 (4)   |
| Cl02 Cd01 Cl1 <sup>6</sup>              | 91.55 (4)   | Cl02 Sb01 Cl1 <sup>1</sup>              | 88.45 (4)   |
| Cl02 Cd01 Cl1 <sup>2</sup>              | 89.86 (4)   | Cl02 <sup>1</sup> Sb01 Cl1 <sup>3</sup> | 89.86 (4)   |
| Cl02 <sup>1</sup> Cd01 Cl1 <sup>7</sup> | 91.55 (4)   | Cl02 Sb01 Cl1 <sup>4</sup>              | 90.14 (4)   |
| Cl02 Cd01 Cl1 <sup>1</sup>              | 88.45 (4)   | Cl02 <sup>1</sup> Sb01 Cl1              | 88.45 (4)   |
| Cl02 Cd01 Cl1 <sup>7</sup>              | 88.45 (4)   | Cl02 <sup>1</sup> Sb01 Cl1 <sup>6</sup> | 88.45 (4)   |
| Cl02 <sup>1</sup> Cd01 Cl1 <sup>5</sup> | 90.14 (4)   | Cl02 <sup>1</sup> Sb01 Cl1 <sup>2</sup> | 90.14 (4)   |
| Cl02 <sup>1</sup> Cd01 Cl1              | 88.45 (4)   | Cl02 Sb01 Cl1                           | 91.55 (4)   |
| Cl02 <sup>1</sup> Cd01 Cl1 <sup>6</sup> | 88.45 (4)   | Cl02 <sup>1</sup> Sb01 Cl1 <sup>1</sup> | 91.55 (4)   |
| Cl02 <sup>1</sup> Cd01 Cl1 <sup>4</sup> | 89.86 (4)   | Cl1 <sup>1</sup> Sb01 Cl1 <sup>2</sup>  | 12.77 (6)   |
| Cl1 <sup>6</sup> Cd01 Cl1 <sup>7</sup>  | 180.00 (7)  | Cl1 Sb01 Cl1 <sup>4</sup>               | 12.77 (6)   |
| Cl1 <sup>7</sup> Cd01 Cl1 <sup>4</sup>  | 92.079 (16) | Cl1 <sup>1</sup> Sb01 Cl1 <sup>3</sup>  | 92.079 (16) |
| Cl1 <sup>1</sup> Cd01 Cl1 <sup>6</sup>  | 79.44 (6)   | Cl1 <sup>2</sup> Sb01 Cl1 <sup>3</sup>  | 104.77 (6)  |
| Cl1 <sup>6</sup> Cd01 Cl1 <sup>5</sup>  | 167.23 (6)  | Cl1 <sup>1</sup> Sb01 Cl1               | 180.0       |
| Cl1 <sup>7</sup> Cd01 Cl1 <sup>5</sup>  | 12.77 (6)   | Cl1 <sup>2</sup> Sb01 Cl1 <sup>5</sup>  | 75.23 (6)   |
| Cl1 Cd01 Cl1 <sup>5</sup>               | 92.078 (16) | Cl1 Sb01 Cl1 <sup>3</sup>               | 87.922 (16) |
| Cl1 <sup>7</sup> Cd01 Cl1 <sup>3</sup>  | 167.23 (6)  | Cl1 <sup>7</sup> Sb01 Cl1 <sup>2</sup>  | 87.921 (16) |
| Cl1 <sup>4</sup> Cd01 Cl1 <sup>5</sup>  | 104.77 (6)  | Cl1 <sup>2</sup> Sb01 Cl1 <sup>4</sup>  | 180.00 (7)  |
| Cl1 <sup>3</sup> Cd01 Cl1 <sup>5</sup>  | 180.00 (7)  | Cl1 <sup>1</sup> Sb01 Cl1 <sup>5</sup>  | 87.921 (16) |
| Cl1 <sup>1</sup> Cd01 Cl1 <sup>3</sup>  | 92.079 (16) | Cl1 <sup>6</sup> Sb01 Cl1               | 100.57 (6)  |
| Cl1 <sup>1</sup> Cd01 Cl1 <sup>7</sup>  | 100.56 (6)  | Cl1 Sb01 Cl1 <sup>2</sup>               | 167.23 (6)  |
| Cl1 <sup>7</sup> Cd01 Cl1 <sup>2</sup>  | 87.921 (16) | Cl1 <sup>6</sup> Sb01 Cl1 <sup>2</sup>  | 92.079 (16) |
| Cl1 <sup>1</sup> Cd01 Cl1 <sup>4</sup>  | 167.23 (6)  | Cl1 <sup>7</sup> Sb01 Cl1 <sup>3</sup>  | 167.23 (6)  |
| Cl1 <sup>6</sup> Cd01 Cl1 <sup>3</sup>  | 12.77 (6)   | Cl1 <sup>4</sup> Sb01 Cl1 <sup>3</sup>  | 75.23 (6)   |
| Cl1 <sup>2</sup> Cd01 Cl1 <sup>3</sup>  | 104.77 (6)  | Cl1 <sup>1</sup> Sb01 Cl1 <sup>6</sup>  | 79.44 (6)   |
| Cl1 Cd01 Cl1 <sup>2</sup>               | 167.23 (6)  | Cl1 <sup>3</sup> Sb01 Cl1 <sup>5</sup>  | 180.00 (7)  |
| Cl1 <sup>7</sup> Cd01 Cl1               | 79.43 (6)   | Cl1 <sup>7</sup> Sb01 Cl1               | 79.43 (6)   |
| Cl1 Cd01 Cl1 <sup>4</sup>               | 12.77 (6)   | Cl1 <sup>6</sup> Sb01 Cl1 <sup>5</sup>  | 167.23 (6)  |
| Cl1 <sup>1</sup> Cd01 Cl1 <sup>2</sup>  | 12.77 (6)   | Cl1 <sup>1</sup> Sb01 Cl1 <sup>7</sup>  | 100.56 (6)  |
| Cl1 <sup>2</sup> Cd01 Cl1 <sup>4</sup>  | 180.00 (7)  | Cl1 Sb01 Cl1 <sup>5</sup>               | 92.078 (16) |



**Table S9-4 Bond Angles for Sb:PDACdCl.**

| Atom              | Atom | Atom              | Angle/°     | Atom             | Atom | Atom              | Angle/°     |
|-------------------|------|-------------------|-------------|------------------|------|-------------------|-------------|
| Cl1               | Cd01 | Cl1 <sup>3</sup>  | 87.922 (16) | Cl1 <sup>7</sup> | Sb01 | Cl1 <sup>5</sup>  | 12.77 (6)   |
| Cl1 <sup>1</sup>  | Cd01 | Cl1               | 180.0       | Cl1 <sup>4</sup> | Sb01 | Cl1 <sup>5</sup>  | 104.77 (6)  |
| Cl1 <sup>2</sup>  | Cd01 | Cl1 <sup>5</sup>  | 75.23 (6)   | Cl1 <sup>1</sup> | Sb01 | Cl1 <sup>4</sup>  | 167.23 (6)  |
| Cl1 <sup>6</sup>  | Cd01 | Cl1               | 100.57 (6)  | Cl1 <sup>6</sup> | Sb01 | Cl1 <sup>3</sup>  | 12.77 (6)   |
| Cl1 <sup>6</sup>  | Cd01 | Cl1 <sup>2</sup>  | 92.079 (16) | Cl1 <sup>6</sup> | Sb01 | Cl1 <sup>7</sup>  | 180.00 (7)  |
| Cl1 <sup>4</sup>  | Cd01 | Cl1 <sup>3</sup>  | 75.23 (6)   | Cl1 <sup>6</sup> | Sb01 | Cl1 <sup>4</sup>  | 87.921 (16) |
| Cl1 <sup>1</sup>  | Cd01 | Cl1 <sup>5</sup>  | 87.921 (16) | Cl1 <sup>7</sup> | Sb01 | Cl1 <sup>4</sup>  | 92.079 (16) |
| Cl1 <sup>6</sup>  | Cd01 | Cl1 <sup>4</sup>  | 87.921 (16) | Cd01             | Cl1  | Cd01 <sup>9</sup> | 160.76 (6)  |
| C006              | C005 | C006 <sup>8</sup> | 126.4 (8)   | Cl1 <sup>4</sup> | Cl1  | Cd01              | 85.0 (5)    |
| C007              | C006 | C005              | 125.5 (6)   | Cl1 <sup>4</sup> | Cl1  | Cd01 <sup>9</sup> | 82.3 (5)    |
| N004              | C007 | C006              | 125.0 (5)   | Cl1 <sup>4</sup> | Cl1  | Sb01              | 85.0 (5)    |
| Cl02 <sup>1</sup> | Sb01 | Cl02              | 180.0       |                  |      |                   |             |

<sup>1</sup>1-X,1-Y,-Z; <sup>2</sup>-1/2+X,1-Y,-1/2+Z; <sup>3</sup>-1/2+X,+Y,1/2-Z; <sup>4</sup>3/2-X,+Y,1/2-Z; <sup>5</sup>3/2-X,1-Y,-1/2+Z; <sup>6</sup>1-X,+Y,+Z; <sup>7</sup>+X,1-Y,-Z; <sup>8</sup>1-X,3/2-Y,+Z; <sup>9</sup>3/2-X,1-Y,1/2+Z

**Table S9-5 Torsion Angles for Sb:PDACdCl.**

| A    | B    | C    | D    | Angle/°     | A                 | B    | C    | D    | Angle/°     |
|------|------|------|------|-------------|-------------------|------|------|------|-------------|
| C005 | C006 | C007 | N004 | 180.000 (4) | C006 <sup>1</sup> | C005 | C006 | C007 | 180.000 (5) |

<sup>1</sup>1-X,3/2-Y,+Z

**Table S9-6 Hydrogen Atom Coordinates ( $\text{\AA} \times 10^4$ ) and Isotropic Displacement Parameters ( $\text{\AA}^2 \times 10^3$ ) for Sb:PDACdCl.**

| Atom | x       | y       | z       | U(eq) |
|------|---------|---------|---------|-------|
| H00A | 6150.23 | 5799.03 | 4833.32 | 69    |
| H00B | 4640.47 | 5989.23 | 3642.24 | 69    |
| H00C | 4209.3  | 5712.55 | 5374.9  | 69    |
| H00E | 6085.67 | 7500    | 6442.07 | 57    |
| H00D | 3914.33 | 7500    | 6442.06 | 57    |
| H00G | 3913.6  | 6973.51 | 3989.83 | 84    |
| H00F | 6086.4  | 6973.51 | 3989.83 | 84    |
| H00I | 6086.78 | 6461.36 | 6458.33 | 65    |
| H00H | 3913.22 | 6461.36 | 6458.33 | 65    |

**Table S9-7 Atomic Occupancy for Sb:PDACdCl.**

| Atom | Occupancy | Atom | Occupancy | Atom | Occupancy |
|------|-----------|------|-----------|------|-----------|
| H00A | 0.5       | H00B | 0.5       | H00C | 0.5       |
| H00E | 0.5       | H00D | 0.5       | H00G | 0.5       |
| H00F | 0.5       | H00I | 0.5       | H00H | 0.5       |
| Sb01 | 0.0001    | Cl1  | 0.5       |      |           |

Table S10: Summary of SCXRD structural analysis and tables of bond lengths, bond angles, dihedral angles for PDASbCl

## PDASbCl

**Table S10-1 Crystal data and structure refinement for PDASbCl.**

|                                             |                                                                  |
|---------------------------------------------|------------------------------------------------------------------|
| Identification code                         | PDASbCl                                                          |
| Empirical formula                           | C <sub>5</sub> H <sub>16</sub> Cl <sub>5</sub> N <sub>2</sub> Sb |
| Formula weight                              | 403.20                                                           |
| Temperature/K                               | 100.00                                                           |
| Crystal system                              | orthorhombic                                                     |
| Space group                                 | P2 <sub>1</sub> 2 <sub>1</sub> 2 <sub>1</sub>                    |
| a/Å                                         | 7.5550(5)                                                        |
| b/Å                                         | 13.3233(10)                                                      |
| c/Å                                         | 13.7812(10)                                                      |
| α/°                                         | 90                                                               |
| β/°                                         | 90                                                               |
| γ/°                                         | 90                                                               |
| Volume/Å <sup>3</sup>                       | 1387.18(17)                                                      |
| Z                                           | 4                                                                |
| ρ <sub>calc</sub> /cm <sup>3</sup>          | 1.931                                                            |
| μ/mm <sup>-1</sup>                          | 2.917                                                            |
| F(000)                                      | 784.0                                                            |
| Crystal size/mm <sup>3</sup>                | 0.21 × 0.2 × 0.19                                                |
| Radiation                                   | MoKα (λ = 0.71073)                                               |
| 2θ range for data collection/°              | 5.912 to 52.94                                                   |
| Index ranges                                | -9 ≤ h ≤ 9, -16 ≤ k ≤ 16, -17 ≤ l ≤ 17                           |
| Reflections collected                       | 31654                                                            |
| Independent reflections                     | 2864 [R <sub>int</sub> = 0.0329, R <sub>sigma</sub> = 0.0165]    |
| Data/restraints/parameters                  | 2864/0/120                                                       |
| Goodness-of-fit on F <sup>2</sup>           | 1.116                                                            |
| Final R indexes [I ≥ 2σ (I)]                | R <sub>1</sub> = 0.0094, wR <sub>2</sub> = 0.0231                |
| Final R indexes [all data]                  | R <sub>1</sub> = 0.0096, wR <sub>2</sub> = 0.0232                |
| Largest diff. peak/hole / e Å <sup>-3</sup> | 0.23/-0.31                                                       |

Flack parameter

-0.010(5)

**Table S10-2 Fractional Atomic Coordinates ( $\times 10^4$ ) and Equivalent Isotropic Displacement Parameters ( $\text{\AA}^2 \times 10^3$ ) for PDASbCl.  $U_{eq}$  is defined as 1/3 of the trace of the orthogonalised  $U_{ij}$  tensor.**

| Atom | x          | y           | z           | U(eq)      |
|------|------------|-------------|-------------|------------|
| Sb01 | 4828.1 (2) | 8674.4 (2)  | 8970.2 (2)  | 11.13 (4)  |
| Cl02 | 5557.0 (6) | 7300.4 (3)  | 7592.2 (3)  | 15.92 (10) |
| Cl03 | 2352.5 (6) | 9423.4 (4)  | 8002.9 (4)  | 18.79 (10) |
| Cl04 | 7638.8 (7) | 7919.5 (4)  | 10092.4 (3) | 18.43 (10) |
| Cl05 | 6937.4 (7) | 9804.6 (4)  | 8225.2 (4)  | 19.47 (11) |
| Cl06 | 4322.9 (7) | 9809.8 (4)  | 10471.4 (4) | 21.64 (11) |
| N007 | 9874 (2)   | 4672.2 (11) | 3935.2 (12) | 18.1 (3)   |
| N008 | 9714 (2)   | 7416.3 (13) | 8080.6 (11) | 18.0 (3)   |
| C009 | 10000 (3)  | 6059.7 (14) | 5129.8 (13) | 15.3 (4)   |
| C00A | 10911 (3)  | 7043.6 (15) | 5398.7 (14) | 17.2 (4)   |
| C00B | 10139 (3)  | 7522.3 (14) | 6312.0 (13) | 16.9 (4)   |
| C00C | 10525 (3)  | 6917.3 (15) | 7218.1 (13) | 15.9 (4)   |
| C00D | 10719 (3)  | 5657.9 (15) | 4182.8 (14) | 18.7 (4)   |

**Table S10-3 Anisotropic Displacement Parameters ( $\text{\AA}^2 \times 10^3$ ) for PDASbCl. The Anisotropic displacement factor exponent takes the form:  $-2\pi^2[h^2a^{*2}U_{11}+2hka^*b^*U_{12}+\dots]$ .**

| Atom | $U_{11}$  | $U_{22}$  | $U_{33}$  | $U_{23}$   | $U_{13}$   | $U_{12}$   |
|------|-----------|-----------|-----------|------------|------------|------------|
| Sb01 | 11.19 (6) | 11.08 (6) | 11.10 (6) | 0.24 (4)   | -0.36 (5)  | -0.46 (4)  |
| Cl02 | 17.4 (2)  | 14.4 (2)  | 15.9 (2)  | -0.63 (17) | 0.87 (18)  | -0.64 (17) |
| Cl03 | 16.4 (2)  | 19.1 (2)  | 20.9 (2)  | -0.3 (2)   | -4.92 (19) | 3.22 (18)  |
| Cl04 | 17.3 (2)  | 21.4 (2)  | 16.6 (2)  | 0.93 (18)  | -1.25 (19) | 4.74 (19)  |
| Cl05 | 19.6 (2)  | 19.6 (2)  | 19.2 (2)  | 4.0 (2)    | -2.01 (19) | -8.68 (19) |
| Cl06 | 19.1 (3)  | 22.2 (2)  | 23.6 (3)  | -9.2 (2)   | -0.1 (2)   | 2.54 (19)  |
| N007 | 22.1 (8)  | 15.5 (7)  | 16.7 (7)  | -2.7 (6)   | -0.5 (9)   | 0.6 (7)    |
| N008 | 17.2 (8)  | 22.8 (8)  | 14.1 (7)  | -2.3 (7)   | -0.1 (7)   | 1.4 (7)    |
| C009 | 16.7 (9)  | 15.5 (8)  | 13.8 (8)  | -1.3 (7)   | 0.9 (8)    | -1.3 (8)   |
| C00A | 22.8 (11) | 16.0 (10) | 12.7 (9)  | -0.1 (8)   | 2.9 (8)    | -4.0 (8)   |
| C00B | 21.1 (10) | 15.0 (9)  | 14.6 (8)  | -1.4 (7)   | -0.4 (8)   | -0.8 (8)   |
| C00C | 16.0 (10) | 19.1 (9)  | 12.6 (9)  | -2.0 (7)   | 1.3 (7)    | 0.8 (8)    |
| C00D | 24.0 (11) | 16.2 (9)  | 15.8 (10) | -2.8 (8)   | 2.9 (8)    | -4.6 (8)   |

**Table S10-4 Bond Lengths for PDASbCl.**

| Atom | Atom | Length/Å   | Atom | Atom | Length/Å  |
|------|------|------------|------|------|-----------|
| Sb01 | Cl02 | 2.6947 (5) | N008 | C00C | 1.494 (2) |
| Sb01 | Cl03 | 2.5041 (5) | C009 | C00A | 1.526 (3) |
| Sb01 | Cl04 | 2.8129 (5) | C009 | C00D | 1.512 (3) |
| Sb01 | Cl05 | 2.4209 (5) | C00A | C00B | 1.527 (3) |
| Sb01 | Cl06 | 2.5911 (5) | C00B | C00C | 1.515 (3) |
| N007 | C00D | 1.500 (2)  |      |      |           |

**Table S10-5 Bond Angles for PDASbCl.**

| Atom | Atom | Atom | Angle/°      | Atom | Atom | Atom | Angle/°      |
|------|------|------|--------------|------|------|------|--------------|
| Cl02 | Sb01 | Cl04 | 89.444 (15)  | Cl06 | Sb01 | Cl02 | 171.657 (16) |
| Cl03 | Sb01 | Cl02 | 92.762 (16)  | Cl06 | Sb01 | Cl04 | 83.163 (16)  |
| Cl03 | Sb01 | Cl04 | 177.409 (16) | C00D | C009 | C00A | 110.57 (16)  |
| Cl03 | Sb01 | Cl06 | 94.725 (17)  | C009 | C00A | C00B | 112.74 (17)  |
| Cl05 | Sb01 | Cl02 | 89.378 (17)  | C00C | C00B | C00A | 112.57 (16)  |
| Cl05 | Sb01 | Cl03 | 91.033 (18)  | N008 | C00C | C00B | 109.88 (15)  |
| Cl05 | Sb01 | Cl04 | 87.631 (17)  | N007 | C00D | C009 | 110.69 (16)  |
| Cl05 | Sb01 | Cl06 | 94.156 (18)  |      |      |      |              |

**Table S10-6 Torsion Angles for PDASbCl.**

| A    | B    | C    | D    | Angle/°     | A    | B    | C    | D    | Angle/°     |
|------|------|------|------|-------------|------|------|------|------|-------------|
| C009 | C00A | C00B | C00C | 68.1 (2)    | C00A | C00B | C00C | N008 | 179.15 (17) |
| C00A | C009 | C00D | N007 | 177.92 (17) | C00D | C009 | C00A | C00B | 175.80 (17) |

**Table S10-7 Hydrogen Atom Coordinates ( $\text{\AA} \times 10^4$ ) and Isotropic Displacement Parameters ( $\text{\AA}^2 \times 10^3$ ) for PDASbCl.**

| Atom | x        | y       | z       | U(eq) |
|------|----------|---------|---------|-------|
| H00A | 10057.28 | 4533.36 | 3296.49 | 22    |
| H00B | 8690.65  | 4706.78 | 4053.67 | 22    |
| H00C | 10361.14 | 4178.49 | 4305.09 | 22    |
| H00D | 8515.82  | 7428.2  | 8011.95 | 22    |
| H00E | 10127.97 | 8055.7  | 8128.57 | 22    |
| H00F | 10002.53 | 7069.04 | 8626.67 | 22    |

**Table S10-7 Hydrogen Atom Coordinates ( $\text{\AA}\times 10^4$ ) and Isotropic Displacement Parameters ( $\text{\AA}^2\times 10^3$ ) for PDASbCl.**

| Atom | <i>x</i> | <i>y</i> | <i>z</i> | U(eq) |
|------|----------|----------|----------|-------|
| H00G | 10194.73 | 5560.03  | 5650.63  | 18    |
| H00H | 8709.51  | 6172.67  | 5068.52  | 18    |
| H00I | 10795.63 | 7520.37  | 4851.37  | 21    |
| H00J | 12188.33 | 6915.38  | 5501.58  | 21    |
| H00K | 10637.61 | 8204.79  | 6389.25  | 20    |
| H00L | 8841.6   | 7588.6   | 6234.76  | 20    |
| H00M | 10036.62 | 6231.82  | 7146.51  | 19    |
| H00N | 11820.94 | 6861.28  | 7310.78  | 19    |
| H00O | 10485.24 | 6147.06  | 3657.45  | 22    |
| H00P | 12016.77 | 5569.08  | 4236.4   | 22    |

Table S11: Summary of SCXRD structural analysis and tables of bond lengths, bond angles, dihedral angles for DABCdCl

## DABCdCl

**Table S11-1 Fractional Atomic Coordinates ( $\times 10^4$ ) and Equivalent Isotropic Displacement Parameters ( $\text{\AA}^2\times 10^3$ ) for DABCdCl.  $U_{eq}$  is defined as 1/3 of the trace of the orthogonalised  $U_{ij}$  tensor.**

| Atom | <i>x</i>    | <i>y</i>    | <i>z</i>    | U(eq)      |
|------|-------------|-------------|-------------|------------|
| Cd1  | 5000        | 5000        | 0           | 12.35 (18) |
| Cl1  | 5349.3 (10) | 2613.0 (10) | 2669.5 (10) | 16.5 (2)   |
| Cl2  | 2323.0 (8)  | 4475.2 (12) | -591.4 (11) | 18.8 (2)   |
| N1   | 7315 (4)    | 5311 (4)    | 5670 (5)    | 19.3 (7)   |
| C1   | 8606 (4)    | 4261 (5)    | 6419 (5)    | 22.5 (7)   |
| C2   | 9633 (4)    | 4133 (4)    | 5138 (5)    | 19.6 (7)   |
| O1   | 5000        | 5000        | 5000        | 56 (4)     |

**Table S11-2 Anisotropic Displacement Parameters ( $\text{\AA}^2\times 10^3$ ) for DABCdCl. The Anisotropic displacement factor exponent takes the form:  $-2\pi^2[h^2a^{*2}U_{11}+2hka^*b^*U_{12}+\dots]$ .**

| Atom | U <sub>11</sub> | U <sub>22</sub> | U <sub>33</sub> | U <sub>12</sub> | U <sub>13</sub> | U <sub>23</sub> |
|------|-----------------|-----------------|-----------------|-----------------|-----------------|-----------------|
| Cd1  | 12.4 (2)        | 12.3 (3)        | 12.5 (2)        | -1.13 (10)      | 2.90 (15)       | 0.14 (9)        |
| Cl1  | 18.7 (4)        | 15.1 (4)        | 16.3 (4)        | 1.8 (3)         | 5.5 (3)         | 5.4 (3)         |
| Cl2  | 13.3 (4)        | 16.5 (4)        | 26.1 (4)        | -0.7 (3)        | 3.2 (3)         | 0.1 (3)         |
| N1   | 20.0 (16)       | 14.0 (12)       | 26.8 (18)       | 2.7 (13)        | 11.8 (14)       | -0.3 (14)       |
| C1   | 19.8 (17)       | 24.9 (19)       | 23.2 (17)       | 2.4 (14)        | 5.6 (14)        | 5.2 (14)        |
| C2   | 20.7 (16)       | 15.6 (17)       | 23.5 (17)       | 0.8 (15)        | 7.0 (13)        | -0.6 (12)       |
| O1   | 25 (6)          | 55 (9)          | 75 (11)         | -4 (4)          | -18 (6)         | -2 (4)          |

**Table S11-3 Bond Lengths for DABCdCl.**

| Atom | Atom             | Length/Å   | Atom | Atom             | Length/Å   |
|------|------------------|------------|------|------------------|------------|
| Cd1  | Cl1 <sup>1</sup> | 2.6905 (7) | Cd1  | Cl2 <sup>1</sup> | 2.4999 (8) |
| Cd1  | Cl1              | 2.6905 (7) | N1   | C1               | 1.466 (5)  |
| Cd1  | Cl1 <sup>2</sup> | 2.7236 (7) | C1   | C2               | 1.514 (5)  |
| Cd1  | Cl1 <sup>3</sup> | 2.7236 (7) | C2   | C2 <sup>4</sup>  | 1.517 (7)  |
| Cd1  | Cl2              | 2.4999 (8) |      |                  |            |

<sup>1</sup>1-X,1-Y,-Z; <sup>2</sup>+X,1/2-Y,-1/2+Z; <sup>3</sup>1-X,1/2+Y,1/2-Z; <sup>4</sup>2-X,1-Y,1-Z

**Table S11-4 Bond Angles for DABCdCl.**

| Atom             | Atom | Atom             | Angle/°    | Atom             | Atom | Atom             | Angle/°   |
|------------------|------|------------------|------------|------------------|------|------------------|-----------|
| Cl1              | Cd1  | Cl1 <sup>1</sup> | 180.0      | Cl2 <sup>1</sup> | Cd1  | Cl1              | 90.53 (3) |
| Cl1              | Cd1  | Cl1 <sup>2</sup> | 90.261 (7) | Cl2              | Cd1  | Cl1              | 89.47 (3) |
| Cl1 <sup>3</sup> | Cd1  | Cl1 <sup>1</sup> | 90.261 (7) | Cl2 <sup>1</sup> | Cd1  | Cl1 <sup>3</sup> | 88.81 (3) |
| Cl1 <sup>3</sup> | Cd1  | Cl1 <sup>2</sup> | 180.0      | Cl2              | Cd1  | Cl1 <sup>1</sup> | 90.53 (3) |
| Cl2 <sup>1</sup> | Cd1  | Cl1 <sup>1</sup> | 89.47 (3)  | Cl2              | Cd1  | Cl2 <sup>1</sup> | 180.0     |
| Cl2              | Cd1  | Cl1 <sup>3</sup> | 91.19 (3)  | C2               | C1   | N1               | 111.9 (3) |
| Cl2              | Cd1  | Cl1 <sup>2</sup> | 88.81 (3)  | C2 <sup>4</sup>  | C2   | C1               | 113.9 (4) |
| Cl2 <sup>1</sup> | Cd1  | Cl1 <sup>2</sup> | 91.19 (3)  |                  |      |                  |           |

<sup>1</sup>1-X,1-Y,-Z; <sup>2</sup>1-X,1/2+Y,1/2-Z; <sup>3</sup>+X,1/2-Y,-1/2+Z; <sup>4</sup>2-X,1-Y,1-Z

**Table S11-5 Torsion Angles for DABCdCl.**

| A  | B  | C  | D               | Angle/°  | A  | B  | C               | D               | Angle/°    |
|----|----|----|-----------------|----------|----|----|-----------------|-----------------|------------|
| N1 | C1 | C2 | C2 <sup>1</sup> | 68.7 (4) | C1 | C2 | C2 <sup>1</sup> | C1 <sup>1</sup> | -180.0 (4) |

<sup>1</sup>2-X,1-Y,1-Z

**Table S11-6 Hydrogen Atom Coordinates ( $\text{\AA}\times 10^4$ ) and Isotropic Displacement Parameters ( $\text{\AA}^2\times 10^3$ ) for DABCdCl.**

| Atom | <i>x</i>  | <i>y</i>  | <i>z</i>  | U(eq)    |
|------|-----------|-----------|-----------|----------|
| H1d  | 9118 (4)  | 4808 (5)  | 7553 (5)  | 27.0 (9) |
| H1e  | 8303 (4)  | 3056 (5)  | 6695 (5)  | 27.0 (9) |
| H2a  | 9085 (4)  | 3709 (4)  | 3964 (5)  | 23.5 (8) |
| H2b  | 10389 (4) | 3243 (4)  | 5600 (5)  | 23.5 (8) |
| H1a  | 7520 (40) | 6300 (20) | 5420 (50) | 16 (10)  |
| H1b  | 6940 (50) | 4850 (50) | 4740 (30) | 17 (13)  |
| H1c  | 6960 (60) | 5410 (70) | 6530 (50) | 38 (15)  |

**Table S11-7 Atomic Occupancy for DABCdCl.**

| Atom | Occupancy | Atom | Occupancy | Atom | Occupancy |
|------|-----------|------|-----------|------|-----------|
| O1   | 0.500000  |      |           |      |           |

**Table S12:** Summary of SCXRD structural analysis and tables of bond lengths, bond angles, dihedral angles for Sb:DABCdCl

## Sb:DABCdCl

**Table S12-1 Fractional Atomic Coordinates ( $\times 10^4$ ) and Equivalent Isotropic Displacement Parameters ( $\text{\AA}^2\times 10^3$ ) for Sb:DABCdCl.  $U_{\text{eq}}$  is defined as 1/3 of the trace of the orthogonalised  $U_{ij}$  tensor.**

| Atom | <i>x</i>   | <i>y</i>    | <i>z</i>    | U(eq)      |
|------|------------|-------------|-------------|------------|
| Cd1  | 5000       | 0           | 5000        | 13.35 (13) |
| Cl1  | 5343.9 (9) | 2389.3 (11) | 7664.5 (12) | 17.2 (2)   |
| Cl2  | 2321.9 (9) | 523.6 (12)  | 4409.4 (13) | 20.4 (2)   |
| N1   | 2696 (4)   | 4681 (4)    | 4329 (5)    | 20.4 (7)   |
| C1   | 368 (4)    | 5864 (5)    | 4862 (6)    | 21.7 (8)   |
| C2   | 1385 (4)   | 5746 (6)    | 3581 (6)    | 24.7 (9)   |
| Sb1  | 5000       | 0           | 5000        | 13.35 (13) |
| O2   | 5000       | 5000        | 5000        | 69 (4)     |

**Table S12-2 Anisotropic Displacement Parameters ( $\text{\AA}^2 \times 10^3$ ) for Sb:DABCdCl. The Anisotropic displacement factor exponent takes the form:  $-2\pi^2[h^2a^2U_{11}+2hka*b*U_{12}+\dots]$ .**

| Atom | $U_{11}$   | $U_{22}$  | $U_{33}$  | $U_{23}$   | $U_{13}$  | $U_{12}$  |
|------|------------|-----------|-----------|------------|-----------|-----------|
| Cd1  | 12.58 (19) | 13.6 (2)  | 14.2 (2)  | -0.15 (13) | 3.58 (13) | 1.21 (13) |
| Cl1  | 19.9 (4)   | 15.6 (4)  | 17.4 (4)  | -5.5 (3)   | 6.7 (3)   | -2.4 (3)  |
| Cl2  | 13.5 (4)   | 18.7 (4)  | 28.7 (5)  | -0.5 (4)   | 3.4 (3)   | 0.7 (3)   |
| N1   | 19.8 (16)  | 14.6 (16) | 30.0 (19) | -0.3 (14)  | 12.6 (14) | 2.4 (13)  |
| C1   | 22.0 (19)  | 19 (2)    | 25 (2)    | -0.8 (16)  | 7.8 (16)  | 1.1 (16)  |
| C2   | 21.0 (19)  | 26 (2)    | 27 (2)    | 5.4 (17)   | 4.5 (16)  | 2.1 (16)  |
| Sb1  | 12.58 (19) | 13.6 (2)  | 14.2 (2)  | -0.15 (13) | 3.58 (13) | 1.21 (13) |
| O2   | 60 (8)     | 72 (9)    | 69 (9)    | 7 (7)      | 0 (7)     | -9 (7)    |

**Table S12-3 Bond Lengths for Sb:DABCdCl.**

| Atom | Atom             | Length/ $\text{\AA}$ | Atom | Atom            | Length/ $\text{\AA}$ |
|------|------------------|----------------------|------|-----------------|----------------------|
| Cd1  | Cl1 <sup>1</sup> | 2.6908 (8)           | Cl1  | Sb1             | 2.6908 (8)           |
| Cd1  | Cl1 <sup>2</sup> | 2.7256 (8)           | Cl2  | Sb1             | 2.4976 (9)           |
| Cd1  | Cl1 <sup>3</sup> | 2.7256 (8)           | N1   | C2              | 1.485 (5)            |
| Cd1  | Cl1              | 2.6908 (8)           | C1   | C1 <sup>4</sup> | 1.515 (8)            |
| Cd1  | Cl2              | 2.4976 (9)           | C1   | C2              | 1.507 (6)            |
| Cd1  | Cl2 <sup>1</sup> | 2.4975 (9)           |      |                 |                      |

<sup>1</sup>1-X,-Y,1-Z; <sup>2</sup>1-X,-1/2+Y,3/2-Z; <sup>3</sup>+X,1/2-Y,-1/2+Z; <sup>4</sup>-X,1-Y,1-Z

**Table S12-4 Bond Angles for Sb:DABCdCl.**

| Atom             | Atom | Atom             | Angle/ $^\circ$ | Atom             | Atom | Atom             | Angle/ $^\circ$ |
|------------------|------|------------------|-----------------|------------------|------|------------------|-----------------|
| Cl1 <sup>1</sup> | Cd1  | Cl1              | 180.0           | N1               | C2   | C1               | 111.8 (3)       |
| Cl1 <sup>2</sup> | Cd1  | Cl1 <sup>3</sup> | 180.0           | Cl1              | Sb1  | Cl1 <sup>2</sup> | 90.197 (6)      |
| Cl1 <sup>1</sup> | Cd1  | Cl1 <sup>3</sup> | 90.197 (6)      | Cl1 <sup>1</sup> | Sb1  | Cl1 <sup>3</sup> | 90.197 (6)      |
| Cl1              | Cd1  | Cl1 <sup>2</sup> | 90.197 (6)      | Cl1 <sup>2</sup> | Sb1  | Cl1 <sup>3</sup> | 180.0           |
| Cl1 <sup>1</sup> | Cd1  | Cl1 <sup>2</sup> | 89.803 (6)      | Cl1 <sup>1</sup> | Sb1  | Cl1 <sup>2</sup> | 89.803 (6)      |
| Cl1              | Cd1  | Cl1 <sup>3</sup> | 89.803 (6)      | Cl1 <sup>1</sup> | Sb1  | Cl1              | 180.0           |
| Cl2 <sup>1</sup> | Cd1  | Cl1 <sup>3</sup> | 88.88 (3)       | Cl1              | Sb1  | Cl1 <sup>3</sup> | 89.803 (6)      |
| Cl2 <sup>1</sup> | Cd1  | Cl1 <sup>1</sup> | 89.32 (3)       | Cl2              | Sb1  | Cl1 <sup>2</sup> | 88.88 (3)       |
| Cl2              | Cd1  | Cl1              | 89.32 (3)       | Cl2              | Sb1  | Cl1 <sup>1</sup> | 90.68 (3)       |
| Cl2              | Cd1  | Cl1 <sup>1</sup> | 90.68 (3)       | Cl2 <sup>1</sup> | Sb1  | Cl1 <sup>1</sup> | 89.32 (3)       |
| Cl2              | Cd1  | Cl1 <sup>2</sup> | 88.88 (3)       | Cl2 <sup>1</sup> | Sb1  | Cl1 <sup>2</sup> | 91.12 (3)       |
| Cl2              | Cd1  | Cl1 <sup>3</sup> | 91.12 (3)       | Cl2 <sup>1</sup> | Sb1  | Cl1              | 90.68 (3)       |



**Table S12-4 Bond Angles for Sb:DABCdCl.**

| Atom             | Atom | Atom             | Angle/°    | Atom             | Atom | Atom             | Angle/°    |
|------------------|------|------------------|------------|------------------|------|------------------|------------|
| Cl2 <sup>1</sup> | Cd1  | Cl1              | 90.68 (3)  | Cl2 <sup>1</sup> | Sb1  | Cl1 <sup>3</sup> | 88.88 (3)  |
| Cl2 <sup>1</sup> | Cd1  | Cl1 <sup>2</sup> | 91.12 (3)  | Cl2              | Sb1  | Cl1              | 89.32 (3)  |
| Cl2 <sup>1</sup> | Cd1  | Cl2              | 180.00 (4) | Cl2              | Sb1  | Cl1 <sup>3</sup> | 91.12 (3)  |
| Cd1              | Cl1  | Cd1 <sup>4</sup> | 165.91 (4) | Cl2 <sup>1</sup> | Sb1  | Cl2              | 180.00 (4) |
| C2               | C1   | C1 <sup>5</sup>  | 114.2 (4)  |                  |      |                  |            |

<sup>1</sup>1-X,-Y,1-Z; <sup>2</sup>1-X,-1/2+Y,3/2-Z; <sup>3</sup>+X,1/2-Y,-1/2+Z; <sup>4</sup>1-X,1/2+Y,3/2-Z; <sup>5</sup>-X,1-Y,1-Z

**Table S12-5 Torsion Angles for Sb:DABCdCl.**

| A               | B  | C  | D  | Angle/°   | ABCD | Angle/° |
|-----------------|----|----|----|-----------|------|---------|
| C1 <sup>1</sup> | C1 | C2 | N1 | -68.8 (5) |      |         |

<sup>1</sup>-X,1-Y,1-Z

**Table S12-6 Hydrogen Atom Coordinates ( $\text{\AA} \times 10^4$ ) and Isotropic Displacement Parameters ( $\text{\AA}^2 \times 10^3$ ) for Sb:DABCdCl.**

| Atom | x         | y         | z         | U(eq)   |
|------|-----------|-----------|-----------|---------|
| H1D  | -388.43   | 6756.77   | 4409.02   | 26      |
| H1E  | 921.87    | 6283.54   | 6034.76   | 26      |
| H2A  | 867.7     | 5204.15   | 2447.18   | 30      |
| H2B  | 1686.08   | 6951.99   | 3309.04   | 30      |
| H1A  | 3220 (30) | 4650 (80) | 3450 (30) | 53 (18) |
| H1B  | 3140 (50) | 5210 (50) | 5370 (30) | 27 (13) |
| H1C  | 2530 (50) | 3528 (18) | 4560 (60) | 32 (13) |

**Table S12-7 Atomic Occupancy for Sb:DABCdCl.**

| Atom | Occupancy | Atom | Occupancy | Atom | Occupancy |
|------|-----------|------|-----------|------|-----------|
| Sb1  | 0.0001    | O2   | 0.5       |      |           |

Table S13: Summary of SCXRD structural analysis and tables of bond lengths, bond angles, dihedral angles for DABSbCl

## DABSbCl

**Table S13-1 Crystal data and structure refinement for DABSbCl.**

|                                             |                                                                  |
|---------------------------------------------|------------------------------------------------------------------|
| Identification code                         | DABSbCl                                                          |
| Empirical formula                           | C <sub>4</sub> H <sub>14</sub> Cl <sub>5</sub> N <sub>2</sub> Sb |
| Formula weight                              | 389.17                                                           |
| Temperature/K                               | 100.00                                                           |
| Crystal system                              | monoclinic                                                       |
| Space group                                 | P2 <sub>1</sub> /c                                               |
| a/Å                                         | 9.8543(4)                                                        |
| b/Å                                         | 10.2894(4)                                                       |
| c/Å                                         | 12.9617(5)                                                       |
| α/°                                         | 90                                                               |
| β/°                                         | 106.6220(10)                                                     |
| γ/°                                         | 90                                                               |
| Volume/Å <sup>3</sup>                       | 1259.33(9)                                                       |
| Z                                           | 4                                                                |
| ρ <sub>calc</sub> /g/cm <sup>3</sup>        | 2.053                                                            |
| μ/mm <sup>-1</sup>                          | 3.209                                                            |
| F(000)                                      | 752.0                                                            |
| Crystal size/mm <sup>3</sup>                | ? × ? × ?                                                        |
| Radiation                                   | MoKα (λ = 0.71073)                                               |
| 2θ range for data collection/°              | 4.314 to 52.802                                                  |
| Index ranges                                | -12 ≤ h ≤ 12, -12 ≤ k ≤ 12, -16 ≤ l ≤ 16                         |
| Reflections collected                       | 28477                                                            |
| Independent reflections                     | 2586 [R <sub>int</sub> = 0.0339, R <sub>sigma</sub> = 0.0157]    |
| Data/restraints/parameters                  | 2586/0/111                                                       |
| Goodness-of-fit on F <sup>2</sup>           | 1.111                                                            |
| Final R indexes [I >= 2σ (I)]               | R <sub>1</sub> = 0.0122, wR <sub>2</sub> = 0.0292                |
| Final R indexes [all data]                  | R <sub>1</sub> = 0.0132, wR <sub>2</sub> = 0.0297                |
| Largest diff. peak/hole / e Å <sup>-3</sup> | 0.37/-0.34                                                       |

**Table S13-2 Fractional Atomic Coordinates (×10<sup>4</sup>) and Equivalent Isotropic Displacement Parameters (Å<sup>2</sup>×10<sup>3</sup>) for DABSbCl. U<sub>eq</sub> is defined as 1/3 of the trace of the orthogonalised U<sub>ij</sub> tensor.**

| Atom | x           | y          | z          | U(eq)     |
|------|-------------|------------|------------|-----------|
| Sb01 | 3134.7 (2)  | 9166.2 (2) | 4324.0 (2) | 11.66 (4) |
| Cl02 | 6043.2 (4)  | 9489.5 (3) | 3539.0 (3) | 14.96 (7) |
| Cl03 | 11446.8 (4) | 3712.1 (3) | 8061.9 (3) | 16.27 (7) |
| Cl04 | 4512.2 (4)  | 7370.6 (3) | 5337.1 (3) | 17.78 (8) |
| Cl05 | 1089.6 (4)  | 8539.5 (4) | 4830.6 (3) | 19.47 (8) |
| Cl06 | 2420.7 (4)  | 7862.2 (3) | 2703.3 (3) | 19.91 (8) |

**Table S13-2 Fractional Atomic Coordinates ( $\times 10^4$ ) and Equivalent Isotropic Displacement Parameters ( $\text{\AA}^2 \times 10^3$ ) for DABSbCl.  $U_{eq}$  is defined as 1/3 of the trace of the orthogonalised  $U_{ij}$  tensor.**

| Atom | <i>x</i>    | <i>y</i>    | <i>z</i>    | U(eq)    |
|------|-------------|-------------|-------------|----------|
| N007 | 8706.1 (14) | 5448.7 (13) | 7587.3 (10) | 17.7 (3) |
| N008 | 6024.2 (14) | 6455.0 (12) | 3001.8 (10) | 16.1 (3) |
| C009 | 6700.7 (17) | 5657.9 (14) | 3977.8 (12) | 15.6 (3) |
| C00A | 7818.1 (16) | 5474.6 (14) | 6441.4 (11) | 15.2 (3) |
| C00B | 7999.4 (16) | 6360.5 (15) | 4663.5 (12) | 16.3 (3) |
| C00C | 8754.0 (17) | 5631.0 (15) | 5690.3 (12) | 17.9 (3) |

**Table S13-3 Anisotropic Displacement Parameters ( $\text{\AA}^2 \times 10^3$ ) for DABSbCl. The Anisotropic displacement factor exponent takes the form:  $-2\pi^2[h^2a^{*2}U_{11}+2hka^*b^*U_{12}+\dots]$ .**

| Atom | $U_{11}$   | $U_{22}$   | $U_{33}$   | $U_{23}$   | $U_{13}$  | $U_{12}$   |
|------|------------|------------|------------|------------|-----------|------------|
| Sb01 | 10.91 (6)  | 11.33 (6)  | 12.32 (6)  | 0.83 (3)   | 2.67 (4)  | -0.21 (3)  |
| Cl02 | 16.79 (18) | 13.39 (16) | 14.77 (16) | 0.41 (13)  | 4.65 (13) | 1.26 (13)  |
| Cl03 | 14.64 (17) | 15.25 (16) | 18.37 (17) | 0.10 (13)  | 3.84 (14) | 1.08 (13)  |
| Cl04 | 17.50 (18) | 14.33 (16) | 20.17 (18) | 3.15 (13)  | 3.23 (14) | 3.52 (13)  |
| Cl05 | 12.90 (17) | 25.11 (19) | 20.60 (18) | 5.26 (14)  | 5.11 (14) | -2.04 (14) |
| Cl06 | 26.3 (2)   | 16.04 (17) | 15.60 (17) | -2.53 (13) | 3.05 (15) | -3.34 (14) |
| N007 | 14.3 (7)   | 23.6 (7)   | 14.8 (6)   | -0.2 (5)   | 3.3 (5)   | 3.5 (5)    |
| N008 | 16.3 (6)   | 15.3 (6)   | 15.8 (6)   | -2.1 (5)   | 3.2 (5)   | -1.3 (5)   |
| C009 | 18.0 (8)   | 13.3 (7)   | 15.6 (7)   | -0.2 (6)   | 4.9 (6)   | -0.4 (6)   |
| C00A | 13.6 (7)   | 15.8 (7)   | 15.0 (7)   | 0.7 (6)    | 2.1 (6)   | 1.4 (6)    |
| C00B | 16.3 (8)   | 17.2 (7)   | 15.1 (7)   | 0.0 (6)    | 4.0 (6)   | -1.3 (6)   |
| C00C | 13.7 (8)   | 21.3 (8)   | 18.9 (7)   | 1.4 (6)    | 5.3 (6)   | 3.8 (6)    |

**Table S13-4 Bond Lengths for DABSbCl.**

| Atom Atom | Length/ $\text{\AA}$ | Atom Atom | Length/ $\text{\AA}$ |
|-----------|----------------------|-----------|----------------------|
| Sb01 Cl04 | 2.4415 (4)           | N008 C009 | 1.4950 (19)          |
| Sb01 Cl05 | 2.3802 (4)           | C009 C00B | 1.517 (2)            |
| Sb01 Cl06 | 2.4213 (4)           | C00A C00C | 1.529 (2)            |
| N007 C00A | 1.4930 (19)          | C00B C00C | 1.524 (2)            |

**Table S13-5 Bond Angles for DABSbCl.**

| Atom Atom Atom | Angle/ $^\circ$ | Atom Atom Atom | Angle/ $^\circ$ |
|----------------|-----------------|----------------|-----------------|
| Cl05 Sb01 Cl04 | 91.776 (13)     | N007 C00A C00C | 110.28 (12)     |

**Table S13-5 Bond Angles for DABSbCl.**

| Atom | Atom | Atom | Angle/°     | Atom | Atom | Atom | Angle/°     |
|------|------|------|-------------|------|------|------|-------------|
| Cl05 | Sb01 | Cl06 | 91.741 (13) | C009 | C00B | C00C | 113.35 (12) |
| Cl06 | Sb01 | Cl04 | 91.501 (13) | C00B | C00C | C00A | 112.05 (12) |
| N008 | C009 | C00B | 109.37 (12) |      |      |      |             |

**Table S13-6 Torsion Angles for DABSbCl.**

| A    | B    | C    | D    | Angle/°     | A    | B    | C    | D    | Angle/°     |
|------|------|------|------|-------------|------|------|------|------|-------------|
| N007 | C00A | C00C | C00B | 149.41 (13) | C009 | C00B | C00C | C00A | -62.92 (17) |
| N008 | C009 | C00B | C00C | 179.16 (12) |      |      |      |      |             |

**Table S13-7 Hydrogen Atom Coordinates ( $\text{\AA} \times 10^4$ ) and Isotropic Displacement Parameters ( $\text{\AA}^2 \times 10^3$ ) for DABSbCl.**

| Atom | x       | y       | z       | U(eq) |
|------|---------|---------|---------|-------|
| H00A | 9359.52 | 4801.78 | 7678.04 | 21    |
| H00B | 8144.03 | 5303.18 | 8023.53 | 21    |
| H00C | 9156.12 | 6225.21 | 7758.81 | 21    |
| H00D | 5236.54 | 6040.77 | 2594.88 | 19    |
| H00E | 6646.76 | 6564.74 | 2608.35 | 19    |
| H00F | 5777.56 | 7244.85 | 3207.96 | 19    |
| H00G | 6976.79 | 4799.26 | 3757.92 | 19    |
| H00H | 6019.16 | 5516.34 | 4399    | 19    |
| H00I | 7138.91 | 6205.95 | 6332.42 | 18    |
| H00J | 7270.35 | 4656.84 | 6269.43 | 18    |
| H00K | 7712    | 7226.85 | 4858.97 | 20    |
| H00L | 8670.57 | 6495.16 | 4232.51 | 20    |
| H00M | 9625.25 | 6108.36 | 6071.94 | 21    |
| H00N | 9037.3  | 4761.1  | 5499.05 | 21    |

## Sb:DABCdCl\_Dehydrated

**Table S14-1 Crystal data and structure refinement for Sb:DABCdCl\_Dehydrated.**

|                     |                                                                    |
|---------------------|--------------------------------------------------------------------|
| Identification code | Sb:DABCdCl_Dehydrated                                              |
| Empirical formula   | C <sub>4</sub> H <sub>14</sub> CdCl <sub>4</sub> N <sub>2</sub> Sb |
| Formula weight      | 344.37                                                             |
| Temperature/K       | 100.00                                                             |

|                                             |                                                               |
|---------------------------------------------|---------------------------------------------------------------|
| Crystal system                              | monoclinic                                                    |
| Space group                                 | P2 <sub>1</sub> /c                                            |
| a/Å                                         | 9.3984(5)                                                     |
| b/Å                                         | 7.5570(4)                                                     |
| c/Å                                         | 7.6313(4)                                                     |
| α/°                                         | 90                                                            |
| β/°                                         | 102.104(2)                                                    |
| γ/°                                         | 90                                                            |
| Volume/Å <sup>3</sup>                       | 529.95(5)                                                     |
| Z                                           | 2                                                             |
| ρ <sub>calc</sub> /g/cm <sup>3</sup>        | 2.158                                                         |
| μ/mm <sup>-1</sup>                          | 3.014                                                         |
| F(000)                                      | 336.0                                                         |
| Crystal size/mm <sup>3</sup>                | 0.18 × 0.17 × 0.17                                            |
| Radiation                                   | MoKα (λ = 0.71073)                                            |
| 2θ range for data collection/°              | 6.982 to 61.014                                               |
| Index ranges                                | -13 ≤ h ≤ 13, -10 ≤ k ≤ 10, -9 ≤ l ≤ 10                       |
| Reflections collected                       | 10427                                                         |
| Independent reflections                     | 1619 [R <sub>int</sub> = 0.0513, R <sub>sigma</sub> = 0.0331] |
| Data/restraints/parameters                  | 1619/0/53                                                     |
| Goodness-of-fit on F <sup>2</sup>           | 1.091                                                         |
| Final R indexes [I ≥ 2σ (I)]                | R <sub>1</sub> = 0.0248, wR <sub>2</sub> = 0.0611             |
| Final R indexes [all data]                  | R <sub>1</sub> = 0.0276, wR <sub>2</sub> = 0.0619             |
| Largest diff. peak/hole / e Å <sup>-3</sup> | 0.91/-0.88                                                    |

**Table S14-2 Fractional Atomic Coordinates (×10<sup>4</sup>) and Equivalent Isotropic Displacement Parameters (Å<sup>2</sup>×10<sup>3</sup>) for Sb:DABCdCl<sub>2</sub> Dehydrated. U<sub>eq</sub> is defined as 1/3 of the trace of the orthogonalised U<sub>ij</sub> tensor.**

| Atom | x          | y          | z          | U(eq)      |
|------|------------|------------|------------|------------|
| Cd01 | 5000       | 5000       | 5000       | 12.20 (8)  |
| Cl2  | 4647.6 (6) | 7379.5 (6) | 2319.3 (7) | 15.65 (12) |
| Cl1  | 2313.5 (6) | 4476.1 (7) | 4414.6 (8) | 16.97 (12) |
| N1   | 2716 (2)   | 314 (3)    | 4314 (3)   | 19.1 (4)   |
| C2   | 368 (2)    | -870 (3)   | 4864 (3)   | 16.3 (4)   |
| C1   | 1390 (2)   | -754 (3)   | 3570 (3)   | 18.0 (4)   |
| Sb1  | 5000       | 5000       | 5000       | 12.20 (8)  |

**Table S14-3 Anisotropic Displacement Parameters ( $\text{\AA}^2 \times 10^3$ ) for Sb:DABCdCl<sub>2</sub> Dehydrated.**  
**The Anisotropic displacement factor exponent takes the form: -**  
 **$2\pi^2[h^2a^{*2}U_{11}+2hka^*b^*U_{12}+\dots]$ .**

| Atom | $U_{11}$   | $U_{22}$   | $U_{33}$   | $U_{23}$  | $U_{13}$  | $U_{12}$   |
|------|------------|------------|------------|-----------|-----------|------------|
| Cd01 | 13.52 (12) | 11.23 (12) | 11.85 (13) | 0.12 (7)  | 2.68 (8)  | -0.75 (7)  |
| Cl2  | 18.7 (2)   | 13.7 (2)   | 15.2 (2)   | 3.38 (19) | 5.02 (19) | 1.25 (17)  |
| Cl1  | 14.5 (2)   | 14.3 (2)   | 21.5 (3)   | 0.5 (2)   | 2.2 (2)   | -0.43 (18) |
| N1   | 16.0 (9)   | 16.4 (9)   | 25.9 (12)  | 0.1 (8)   | 6.6 (8)   | -0.4 (7)   |
| C2   | 17.3 (10)  | 13.7 (10)  | 18.5 (11)  | 1.9 (9)   | 5.1 (8)   | -0.8 (8)   |
| C1   | 17.7 (10)  | 18.9 (11)  | 17.9 (11)  | -3.3 (9)  | 5.3 (9)   | -1.9 (8)   |
| Sb1  | 13.52 (12) | 11.23 (12) | 11.85 (13) | 0.12 (7)  | 2.68 (8)  | -0.75 (7)  |

**Table S14-4 Bond Lengths for Sb:DABCdCl<sub>2</sub> Dehydrated.**

| Atom | Atom             | Length/ $\text{\AA}$ | Atom | Atom            | Length/ $\text{\AA}$ |
|------|------------------|----------------------|------|-----------------|----------------------|
| Cd01 | Cl2 <sup>1</sup> | 2.6915 (5)           | Cl2  | Sb1             | 2.6915 (5)           |
| Cd01 | Cl2 <sup>2</sup> | 2.7221 (5)           | Cl1  | Sb1             | 2.5016 (5)           |
| Cd01 | Cl2              | 2.6915 (5)           | N1   | C1              | 1.493 (3)            |
| Cd01 | Cl2 <sup>3</sup> | 2.7221 (5)           | C2   | C2 <sup>4</sup> | 1.521 (4)            |
| Cd01 | Cl1 <sup>1</sup> | 2.5016 (5)           | C2   | C1              | 1.517 (3)            |
| Cd01 | Cl1              | 2.5016 (5)           |      |                 |                      |

<sup>1</sup>1-X,1-Y,1-Z; <sup>2</sup>1-X,-1/2+Y,1/2-Z; <sup>3</sup>X,3/2-Y,1/2+Z; <sup>4</sup>-X,-Y,1-Z

**Table S14-5 Bond Angles for Sb:DABCdCl<sub>2</sub> Dehydrated.**

| Atom             | Atom | Atom             | Angle/ $^\circ$ | Atom             | Atom | Atom             | Angle/ $^\circ$ |
|------------------|------|------------------|-----------------|------------------|------|------------------|-----------------|
| Cl2 <sup>1</sup> | Cd01 | Cl2              | 180.0           | N1               | C1   | C2               | 112.06 (19)     |
| Cl2 <sup>1</sup> | Cd01 | Cl2 <sup>2</sup> | 89.760 (5)      | Cl2 <sup>1</sup> | Sb1  | Cl2 <sup>2</sup> | 89.760 (5)      |
| Cl2              | Cd01 | Cl2 <sup>2</sup> | 90.240 (5)      | Cl2              | Sb1  | Cl2 <sup>3</sup> | 89.760 (5)      |
| Cl2 <sup>2</sup> | Cd01 | Cl2 <sup>3</sup> | 180.000 (17)    | Cl2 <sup>1</sup> | Sb1  | Cl2              | 180.0           |
| Cl2 <sup>1</sup> | Cd01 | Cl2 <sup>3</sup> | 90.240 (5)      | Cl2              | Sb1  | Cl2 <sup>2</sup> | 90.240 (5)      |
| Cl2              | Cd01 | Cl2 <sup>3</sup> | 89.760 (5)      | Cl2 <sup>1</sup> | Sb1  | Cl2 <sup>3</sup> | 90.240 (5)      |
| Cl1 <sup>1</sup> | Cd01 | Cl2 <sup>2</sup> | 88.590 (17)     | Cl2 <sup>2</sup> | Sb1  | Cl2 <sup>3</sup> | 180.000 (17)    |
| Cl1              | Cd01 | Cl2 <sup>2</sup> | 91.410 (18)     | Cl1              | Sb1  | Cl2 <sup>2</sup> | 91.410 (18)     |
| Cl1              | Cd01 | Cl2 <sup>1</sup> | 89.354 (18)     | Cl1 <sup>1</sup> | Sb1  | Cl2 <sup>3</sup> | 91.410 (17)     |
| Cl1 <sup>1</sup> | Cd01 | Cl2 <sup>1</sup> | 90.646 (18)     | Cl1              | Sb1  | Cl2 <sup>3</sup> | 88.590 (18)     |
| Cl1 <sup>1</sup> | Cd01 | Cl2              | 89.354 (18)     | Cl1              | Sb1  | Cl2 <sup>1</sup> | 89.354 (18)     |
| Cl1              | Cd01 | Cl2              | 90.646 (18)     | Cl1              | Sb1  | Cl2              | 90.646 (18)     |
| Cl1 <sup>1</sup> | Cd01 | Cl2 <sup>3</sup> | 91.410 (17)     | Cl1 <sup>1</sup> | Sb1  | Cl2 <sup>1</sup> | 90.646 (18)     |
| Cl1              | Cd01 | Cl2 <sup>3</sup> | 88.590 (18)     | Cl1 <sup>1</sup> | Sb1  | Cl2 <sup>2</sup> | 88.590 (17)     |

**Table S14-5 Bond Angles for Sb:DABCdCl\_Dehydrated.**

| Atom             | Atom | Atom              | Angle/°    | Atom             | Atom | Atom | Angle/°     |
|------------------|------|-------------------|------------|------------------|------|------|-------------|
| Cl1 <sup>1</sup> | Cd01 | Cl1               | 180.0      | Cl1 <sup>1</sup> | Sb1  | Cl2  | 89.354 (18) |
| Cd01             | Cl2  | Cd01 <sup>4</sup> | 165.44 (2) | Cl1 <sup>1</sup> | Sb1  | Cl1  | 180.0       |
| C1               | C2   | C2 <sup>5</sup>   | 114.0 (2)  |                  |      |      |             |

<sup>1</sup>1-X,1-Y,1-Z; <sup>2</sup>1-X,-1/2+Y,1/2-Z; <sup>3</sup>+X,3/2-Y,1/2+Z; <sup>4</sup>1-X,1/2+Y,1/2-Z; <sup>5</sup>-X,-Y,1-Z

**Table S14-6 Torsion Angles for Sb:DABCdCl\_Dehydrated.**

| A               | B  | C  | D  | Angle/°  | A | B | C | D | Angle/° |
|-----------------|----|----|----|----------|---|---|---|---|---------|
| C2 <sup>1</sup> | C2 | C1 | N1 | 68.9 (3) |   |   |   |   |         |

<sup>1</sup>-X,-Y,1-Z

**Table S14-7 Hydrogen Atom Coordinates (Å×10<sup>4</sup>) and Isotropic Displacement Parameters (Å<sup>2</sup>×10<sup>3</sup>) for Sb:DABCdCl\_Dehydrated.**

| Atom | x       | y        | z       | U(eq) |
|------|---------|----------|---------|-------|
| H1A  | 3304.37 | 342.72   | 3507.97 | 23    |
| H1B  | 3201.91 | -186.77  | 5352.8  | 23    |
| H1C  | 2448.66 | 1435.65  | 4535.49 | 23    |
| H2A  | 924.52  | -1288.16 | 6038.49 | 20    |
| H2B  | -391.24 | -1762.82 | 4412.24 | 20    |
| H1D  | 1686.82 | -1962.16 | 3296.62 | 22    |
| H1E  | 868.91  | -210.68  | 2435.77 | 22    |

**Table S14-8 Atomic Occupancy for Sb:DABCdCl\_Dehydrated.**

| Atom | Occupancy | Atom | Occupancy | Atom | Occupancy |
|------|-----------|------|-----------|------|-----------|
| Sb1  | 0.0003    |      |           |      |           |

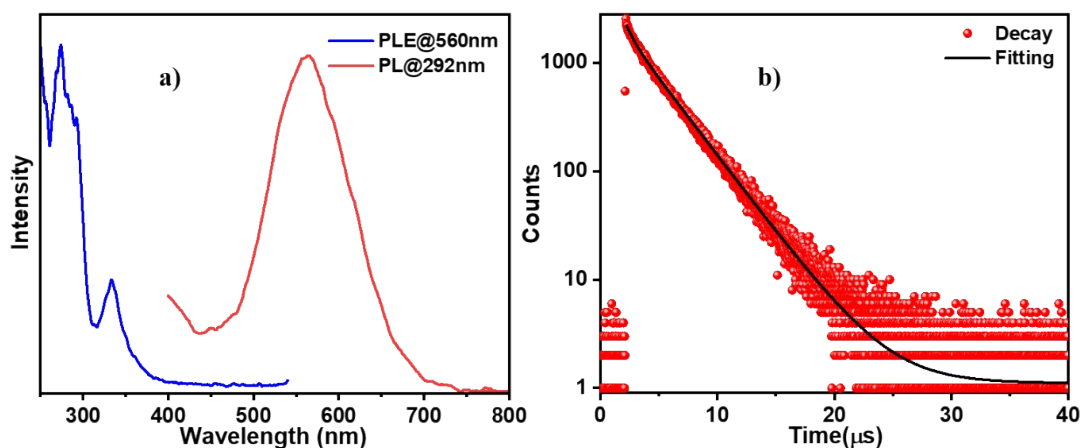

Figure S22: a) PL / PLE of dehydrated Sb:DABCdCl b) Lifetime Decay profile of dehydrated Sb:DABCdCl (Ex:310 nm Em:560 nm ).

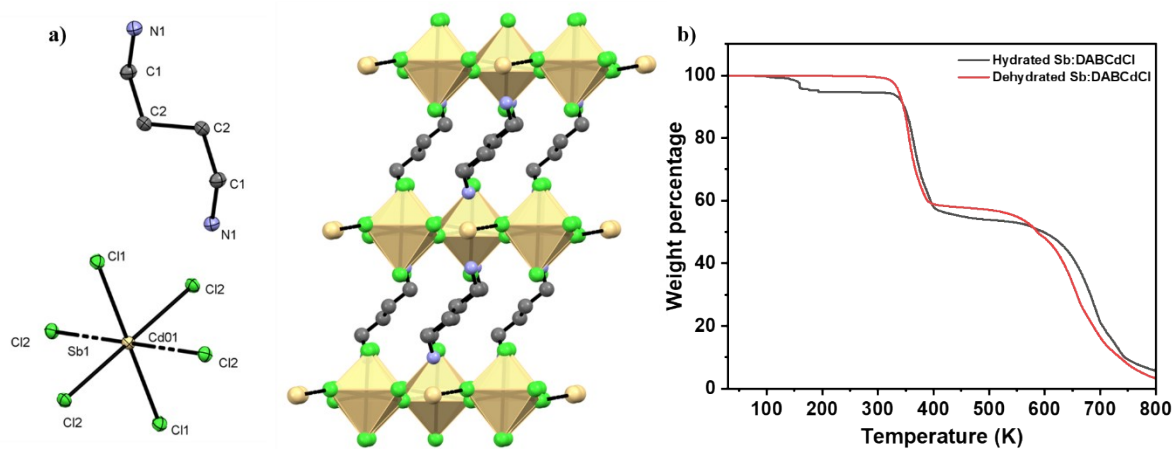

Figure S23: a) SCXRD structure of dehydrated Sb:DABCdCl hybrid b) TGA of Sb:DABCdCl [Black-Hydrated Sb:DABCdCl, Red- Dehydrated Sb:DABCdCl]



Table S14: Distortion parameters and optical properties of Hydrated and dehydrated Sb:DABCdCl

| Compound                                                                                                           | Space group                           | Octahedral distortion (d) | Bond angle variance (deg <sup>2</sup> ) | M-Cl-M (deg) | $\phi_{\text{tilt}}$ (deg) | PL Max (nm) | PLE Peak positions (nm) | PLQY(%) | Lifetime ( $\mu\text{s}$ ) |
|--------------------------------------------------------------------------------------------------------------------|---------------------------------------|---------------------------|-----------------------------------------|--------------|----------------------------|-------------|-------------------------|---------|----------------------------|
| Sb:DABCdCl<br>2(C <sub>4</sub> H <sub>14</sub> N <sub>2</sub> )<br>Cd <sub>2</sub> Cl <sub>8</sub> O<br>(Hydrated) | Monoclinic<br><i>P2<sub>1</sub>/c</i> | 1.4x10 <sup>-3</sup>      | 0.6409                                  | 165.91       | 13.02                      | 560         | 275, 291, 333           | 96      | 3.1 $\mu\text{s}$          |
| Sb:DABCdCl<br>C <sub>4</sub> H <sub>14</sub> N <sub>2</sub> CdCl <sub>4</sub><br>(Dehydrated)                      | Monoclinic<br><i>P2<sub>1</sub>/c</i> | 1.5x10 <sup>-3</sup>      | 0.8956                                  | 165.44       | 12.99                      | 560         | 275, 291, 333           | 39      | 3.02 $\mu\text{s}$         |

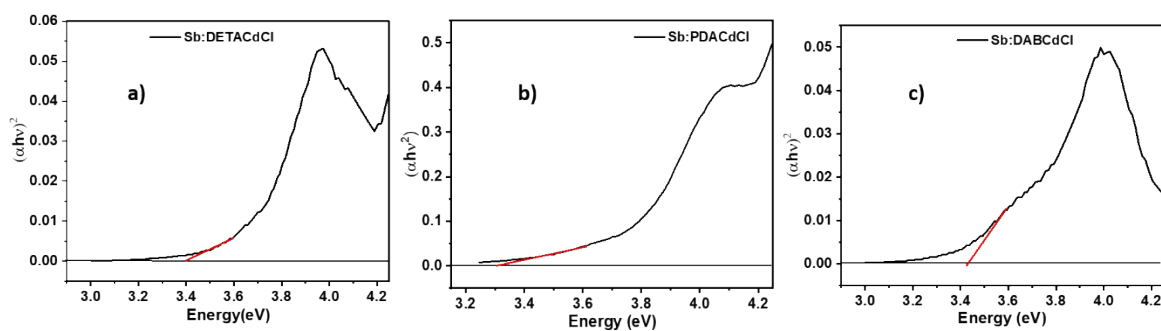

Figure S24: Tauc plot analysis of the doped hybrids- a) Sb:DETACdCl, b) Sb:PDACdCl, c) Sb:DABCdCl

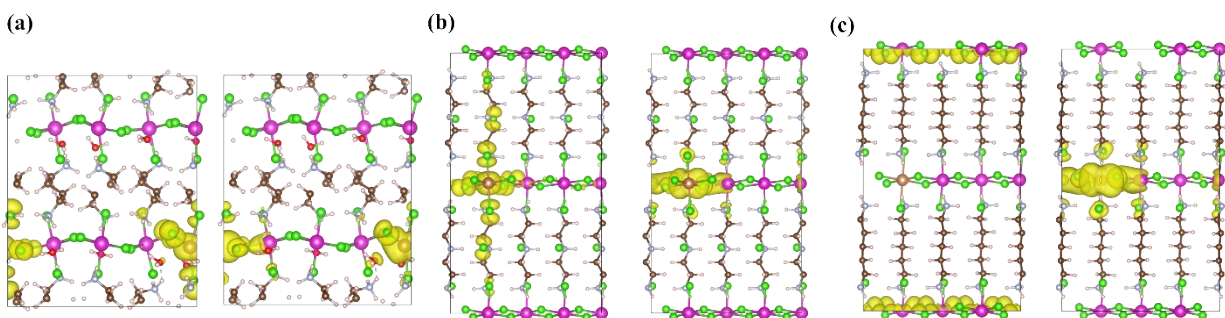

Figure S25: Band edge charge density localization of (a) Sb:DABCdCl (b) Sb:DETACdCl (c) Sb:PDACdCl.

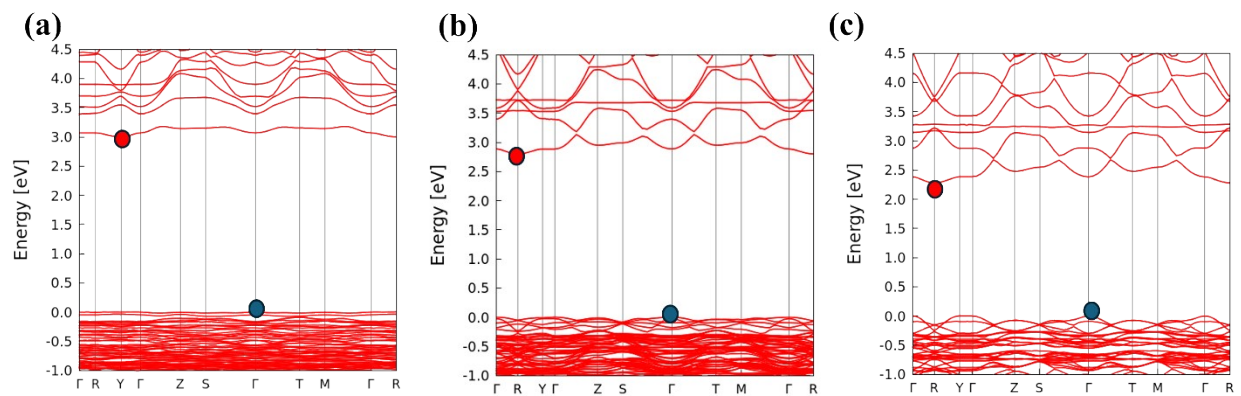

**Figure S26:** Band structure of (a) Sb:DABCdCl (b) Sb:DETACdCl (c) Sb:PDACdCl.

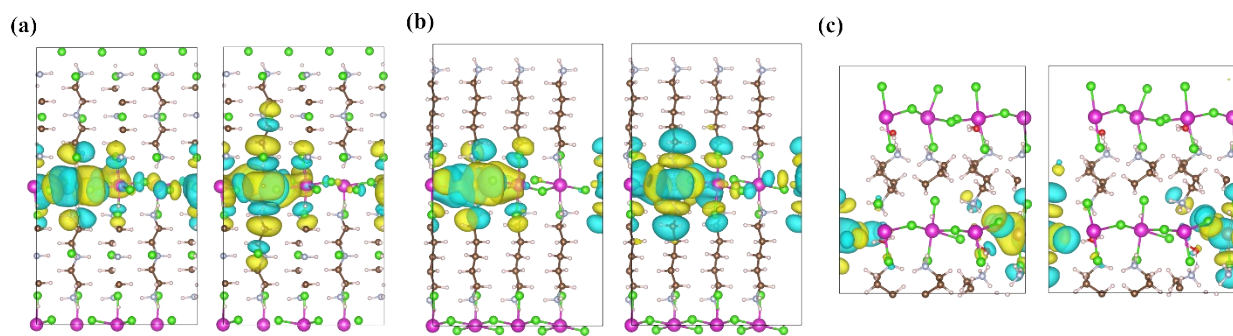

**Figure S27:** STE formation in the studied structure and their Kohn-Sham (KS) orbitals of the electron and hole in triplet state of (a) Sb:DETACdCl (b) Sb:PDACdCl and (c) Sb:DABCdCl.
